# Supplementary material
Source: publisher figshare collection journal article supplement (https://gsapubs.figshare.com/articles/dataset/_/12532325)
Supplement: Supplementary file 1 [file 1]

**Table 1. Whole-rock geochemistry of mantle tectonites by x-ray fluorescence.**

Major and trace elements normalized to 100% anhydrous.

| Sample                         | CR 114-3 | CR 12-1 | CR 90-1 | CR 91-1 | CR 92-1 |
|--------------------------------|----------|---------|---------|---------|---------|
| SiO <sub>2</sub>               | 47.32    | 47.78   | 46.08   | 46.50   | 46.89   |
| TiO <sub>2</sub>               | 0.01     | 0.03    | 0.03    | 0.01    | 0.01    |
| Al <sub>2</sub> O <sub>3</sub> | 0.21     | 0.54    | 0.50    | 0.19    | 0.21    |
| FeO*                           | 7.16     | 7.52    | 8.71    | 8.52    | 8.51    |
| MnO                            | 0.06     | 0.08    | 0.09    | 0.14    | 0.14    |
| MgO                            | 45.23    | 44.05   | 44.57   | 44.64   | 44.23   |
| CaO                            | 0.00     | 0.00    | 0.00    | 0.00    | 0.00    |
| Na <sub>2</sub> O              | 0.00     | 0.00    | 0.00    | 0.00    | 0.00    |
| K <sub>2</sub> O               | 0.00     | 0.00    | 0.00    | 0.00    | 0.00    |
| P <sub>2</sub> O <sub>5</sub>  | 0.01     | 0.00    | 0.01    | 0.01    | 0.01    |
| LOI                            | 12.14    | 12.07   | 12.14   | 13.48   | 13.62   |
|                                |          |         |         |         |         |
| Nb                             | 1.1      | 0.9     | 0.5     | 1       | 0.2     |
| Zr                             | 1        | 1       | 2       | 1       | 1       |
| Y                              | 2        | 1       | 2       | 1       | 2       |
| Sr                             | 0        | 1       | 1       | 4       | 6       |
| Rb                             | 0        | 0       | 0       | 0       | 0       |
| Sc                             | 3        | 1.2     | 8.5     | 2.8     | 2.9     |
| V                              | 11       | 18      | 27      | 8       | 7       |
| Cr                             | 2418     | 1952    | 1609    | 1700    | 1399    |
| Ni                             | 3214     | 2732    | 2618    | 2771    | 2700    |
| Cu                             | 13       | 4       | 43      | 1       | 1       |
| Zn                             | 34       | 34      | 32      | 43      | 37      |
| Ba                             | 0        | 20      | 10      | 0       | 0       |

**Table 2. Whole-rock geochemistry of wehrlitic suite.**

Major and trace elements normalized to 100% anhydrous.

| Sample                         | CR 09-2 | CR 10-1 | CR 114-2 | CR 88-2 | CR 89-2 | CR 90-4 | CR 99-1 |
|--------------------------------|---------|---------|----------|---------|---------|---------|---------|
| SiO <sub>2</sub>               | 45.71   | 45.70   | 45.56    | 48.55   | 50.19   | 46.84   | 42.76   |
| TiO <sub>2</sub>               | 0.20    | 0.19    | 0.17     | 0.30    | 0.13    | 0.14    | 0.08    |
| Al <sub>2</sub> O <sub>3</sub> | 4.41    | 3.82    | 1.51     | 3.51    | 2.70    | 2.12    | 2.53    |
| FeO*                           | 10.42   | 10.32   | 9.79     | 8.66    | 8.91    | 8.38    | 10.75   |
| MnO                            | 0.18    | 0.18    | 0.18     | 0.16    | 0.17    | 0.15    | 0.15    |
| MgO                            | 30.48   | 31.35   | 33.96    | 26.41   | 32.15   | 36.21   | 40.75   |
| CaO                            | 8.27    | 8.16    | 8.69     | 11.88   | 5.71    | 6.03    | 2.95    |
| Na <sub>2</sub> O              | 0.27    | 0.23    | 0.10     | 0.42    | 0.03    | 0.09    | 0.01    |
| K <sub>2</sub> O               | 0.04    | 0.03    | 0.02     | 0.07    | 0.00    | 0.02    | 0.00    |
| P <sub>2</sub> O <sub>5</sub>  | 0.02    | 0.02    | 0.01     | 0.03    | 0.01    | 0.01    | 0.01    |
| LOI                            | 3.68    | 3.94    | 4.54     | 1.62    | 4.20    | 4.94    | 8.26    |
| Mg#                            | 83.91   | 84.41   | 86.08    | 84.46   | 86.54   | 88.51   | 87.10   |
|                                |         |         |          |         |         |         |         |
| Nb                             | 1.1     | 0.8     | 0.9      | 1       | 1       | 0.9     | 1.1     |
| Zr                             | 10      | 9       | 8        | 15      | 4       | 7       | 4       |
| Y                              | 7       | 7       | 7        | 8       | 5       | 5       | 2       |
| Sr                             | 52      | 44      | 19       | 35      | 13      | 15      | 11      |
| Rb                             | 1       | 0       | 0        | 0       | 0       | 0       | 1       |
| Sc                             | 27      | 29.9    | 24.7     | 39.8    | 24.2    | 21.9    | 13.7    |
| V                              | 123     | 118     | 102      | 177     | 99      | 86      | 57      |
| Cr                             | 1817    | 1906    | 1894     | 1463    | 2612    | 1969    | 1771    |
| Ni                             | 940     | 983     | 1010     | 775     | 1356    | 1476    | 1423    |
| Cu                             | 7       | 18      | 9        | 8       | 5       | 2       | 4       |
| Zn                             | 65      | 63      | 50       | 49      | 54      | 44      | 53      |
| Ba                             | 21      | 3       | 9        | 78      | 0       | 9       | 4       |

**Table 3. Whole-rock geochemistry of isotropic gabbros.**

Major and trace elements normalized to 100% anhydrous.

| Sample                         | CR 08-1 | CR 20-1 | CR 21-1 | CR 22-1 | CR 49-1 |
|--------------------------------|---------|---------|---------|---------|---------|
| SiO <sub>2</sub>               | 53.32   | 54.87   | 47.76   | 50.74   | 52.83   |
| TiO <sub>2</sub>               | 1.28    | 1.67    | 1.57    | 1.31    | 0.93    |
| Al <sub>2</sub> O <sub>3</sub> | 13.63   | 13.97   | 14.20   | 14.29   | 12.47   |
| FeO*                           | 11.70   | 11.66   | 12.56   | 11.60   | 10.17   |
| MnO                            | 0.17    | 0.16    | 0.23    | 0.21    | 0.19    |
| MgO                            | 8.47    | 6.15    | 5.76    | 8.84    | 9.97    |
| CaO                            | 6.36    | 5.26    | 12.10   | 8.10    | 9.21    |
| Na <sub>2</sub> O              | 4.59    | 5.93    | 5.13    | 4.10    | 2.86    |
| K <sub>2</sub> O               | 0.29    | 0.03    | 0.46    | 0.51    | 1.22    |
| P <sub>2</sub> O <sub>5</sub>  | 0.20    | 0.30    | 0.23    | 0.30    | 0.16    |
| LOI                            | 1.87    | 3.97    | 4.71    | 4.29    | 1.33    |
| Mg#                            | 56.32   | 48.42   | 44.95   | 57.58   | 63.58   |
|                                |         |         |         |         |         |
| Nb                             | 1.6     | 5.8     | 3.5     | 4.8     | 0       |
| Zr                             | 103     | 131     | 107     | 136     | 106     |
| Y                              | 37      | 43      | 39      | 45      | 33      |
| Sr                             | 472     | 47      | 286     | 342     | 1176    |
| Rb                             | 5       | 0       | 9       | 17      | 20      |
| Sc                             | 27      | 16.2    | 23.3    | 25.1    | 34.2    |
| V                              | 374     | 298     | 404     | 285     | 323     |
| Cr                             | 33      | 28      | 25      | 71      | 61      |
| Ni                             | 21      | 2       | 22      | 24      | 54      |
| Cu                             | 4       | 8       | 78      | 47      | 83      |
| Zn                             | 32      | 60      | 67      | 69      | 69      |
| Ba                             | 68      | 39      | 69      | 131     | 5634    |
|                                |         |         |         |         |         |
| <b>CIPW normalizations</b>     |         |         |         |         |         |
| Orthoclase(Or)                 | 1.69    | 0.17    | 2.74    | 2.99    | 7.20    |
| Albite(Ab)                     | 38.87   | 50.18   | 14.12   | 33.55   | 24.16   |
| Anorthite(An)                  | 15.71   | 11.42   | 14.32   | 19.10   | 17.61   |
| Diopside(Di)                   | 12.03   | 10.61   | 37.08   | 15.77   | 22.13   |
| Hypersthene(Hy)                | 12.12   | 8.90    |         |         | 14.05   |
| Olivine(Ol)                    | 16.70   | 14.86   | 12.37   | 24.81   | 12.74   |
| Ilmenite(Il)                   | 2.44    | 3.17    | 2.98    | 2.48    | 1.77    |
| Apatite(Ap)                    | 0.45    | 0.70    | 0.53    | 0.69    | 0.37    |

**Table 4. Whole-rock geochemistry of volcanic suite.**

Major and trace elements normalized to 100% anhydrous.

| Sample | CR 29-1 | CR 29-2 | CR 30-1 | CR 38-2 | CR 41-3 | CR 66-1 | CR 03-2  | CR 04-1  | CR 40-1  | CR 42-1  | CR 43-1  | CR 46-1  | CR 64-2  | CR 68-1  | CR 79-1  | CR 07-2 | CR 11-2 | CR 30-2 | CR 32-1 | CR 33-1 | CR 73-3 |
|--------|---------|---------|---------|---------|---------|---------|----------|----------|----------|----------|----------|----------|----------|----------|----------|---------|---------|---------|---------|---------|---------|
| Suite  | Arc     | Arc     | Arc     | Arc     | Arc     | Arc     | Boninite | MORB    | MORB    | MORB    | MORB    | MORB    | MORB    |
| SiO2   | 50.43   | 51.43   | 60.33   | 55.10   | 53.04   | 60.86   | 54.67    | 52.93    | 54.14    | 47.55    | 54.57    | 50.68    | 59.24    | 48.32    | 49.32    | 57.75   | 50.49   | 52.45   | 51.06   | 51.51   | 51.60   |
| TiO2   | 0.66    | 0.69    | 0.51    | 0.69    | 0.77    | 0.67    | 0.44     | 0.55     | 0.57     | 0.85     | 0.66     | 0.92     | 0.60     | 0.48     | 0.90     | 1.01    | 1.16    | 1.86    | 2.42    | 2.02    | 2.22    |
| Al2O3  | 13.64   | 15.68   | 14.91   | 14.20   | 14.15   | 18.09   | 11.14    | 10.63    | 15.58    | 14.36    | 14.04    | 13.64    | 17.28    | 9.87     | 14.49    | 15.57   | 13.09   | 13.18   | 12.70   | 13.26   | 13.69   |
| FeO*   | 7.10    | 7.89    | 5.26    | 8.56    | 8.42    | 7.11    | 9.21     | 10.20    | 9.05     | 9.22     | 6.28     | 11.16    | 6.80     | 8.67     | 13.85    | 14.37   | 10.26   | 9.51    | 10.76   | 11.11   | 11.44   |
| MnO    | 0.11    | 0.11    | 0.18    | 0.11    | 0.17    | 0.07    | 0.19     | 0.25     | 0.20     | 0.19     | 0.11     | 0.22     | 0.12     | 0.23     | 0.14     | 0.06    | 0.17    | 0.18    | 0.33    | 0.30    | 0.24    |
| MgO    | 6.97    | 9.15    | 7.47    | 9.69    | 9.61    | 7.78    | 12.66    | 14.15    | 11.89    | 14.46    | 12.33    | 13.02    | 12.21    | 12.63    | 10.90    | 5.11    | 8.59    | 5.44    | 5.54    | 4.21    | 6.35    |
| CaO    | 15.44   | 9.49    | 5.21    | 6.94    | 8.89    | 0.17    | 7.90     | 8.51     | 4.50     | 9.61     | 8.08     | 8.26     | 0.14     | 17.92    | 10.30    | 1.71    | 13.10   | 11.37   | 11.83   | 11.87   | 9.01    |
| Na2O   | 5.50    | 5.39    | 5.90    | 4.55    | 4.80    | 4.80    | 3.71     | 2.53     | 3.93     | 3.60     | 3.81     | 1.92     | 2.67     | 1.80     | 0.00     | 3.77    | 2.93    | 5.73    | 5.08    | 5.42    | 5.17    |
| K2O    | 0.03    | 0.09    | 0.03    | 0.04    | 0.02    | 0.41    | 0.04     | 0.13     | 0.05     | 0.01     | 0.03     | 0.03     | 0.87     | 0.02     | 0.00     | 0.18    | 0.09    | 0.08    | 0.01    | 0.09    | 0.01    |
| P2O5   | 0.12    | 0.09    | 0.21    | 0.13    | 0.13    | 0.03    | 0.05     | 0.11     | 0.11     | 0.14     | 0.08     | 0.15     | 0.08     | 0.06     | 0.08     | 0.48    | 0.12    | 0.22    | 0.26    | 0.22    | 0.26    |
| LOI    | 5.98    | 4.81    | 4.69    | 4.80    | 5.61    | 4.61    | 1.81     | 2.44     | 5.82     | 8.16     | 6.99     | 3.34     | 4.05     | 11.86    | 2.80     | 2.64    | 2.14    | 4.76    | 7.89    | 8.05    | 5.52    |
| Mg#    | 63.62   | 67.39   | 71.69   | 66.86   | 67.03   | 66.12   | 71.01    | 71.19    | 70.07    | 73.65    | 77.78    | 67.52    | 76.19    | 72.20    | 58.39    | 38.77   | 59.88   | 50.49   | 47.84   | 40.31   | 49.71   |
|        |         |         |         |         |         |         |          |          |          |          |          |          |          |          |          |         |         |         |         |         |         |
| Nb     | 1.8     | 1.1     | 3.5     | 1.8     | 1.8     | 1.7     | 1        | 1        | 1.4      | 2        | 1.9      | 0.6      | 2.3      | 0.8      | 1.7      | 2.7     | 1.5     | 4.6     | 4.9     | 4.6     | 5.5     |
| Zr     | 51      | 69      | 83      | 45      | 61      | 47      | 32       | 33       | 46       | 61       | 51       | 68       | 54       | 29       | 61       | 106     | 70      | 117     | 131     | 130     | 133     |
| Y      | 18      | 20      | 15      | 16      | 22      | 14      | 12       | 13       | 16       | 23       | 18       | 25       | 17       | 13       | 23       | 37      | 26      | 37      | 47      | 42      | 46      |
| Sr     | 218     | 557     | 238     | 150     | 214     | 58      | 153      | 184      | 37       | 77       | 69       | 330      | 50       | 40       | 373      | 168     | 320     | 134     | 57      | 180     | 56      |
| Rb     | 1       | 1       | 0       | 0       | 0       | 5       | 1        | 1        | 1        | 0        | 1        | 0        | 13       | 2        | 0        | 2       | 1       | 4       | 0       | 4       | 1       |
| Sc     | 27.3    | 27.5    | 17.2    | 26.5    | 25.2    | 23.4    | 39.7     | 40.3     | 29.4     | 23.6     | 21.4     | 24.2     | 22.4     | 44       | 23.1     | 15      | 33.5    | 27.2    | 31.8    | 31.5    | 31.1    |
| V      | 244     | 231     | 132     | 247     | 215     | 259     | 218      | 241      | 259      | 231      | 182      | 352      | 259      | 261      | 263      | 64      | 337     | 342     | 434     | 329     | 453     |
| Cr     | 195     | 206     | 154     | 131     | 72      | 17      | 307      | 348      | 135      | 131      | 438      | 171      | 108      | 512      | 49       | 8       | 67      | 63      | 59      | 109     | 34      |
| Ni     | 147     | 168     | 123     | 34      | 22      | 4       | 71       | 167      | 33       | 43       | 171      | 83       | 31       | 72       | 30       | 0       | 48      | 25      | 15      | 25      | 10      |
| Cu     | 12      | 12      | 0       | 307     | 1       | 90      | 3        | 1220     | 52       | 6        | 7        | 658      | 34       | 26       | 148      | 2       | 33      | 45      | 46      | 21      | 31      |
| Zn     | 31      | 59      | 44      | 50      | 66      | 25      | 63       | 49       | 97       | 67       | 44       | 48       | 65       | 70       | 16       | 7       | 33      | 83      | 131     | 60      | 108     |
| Ba     | 82      | 203     | 60      | 90      | 25      | 83      | 31       | 57       | 26       | 126      | 44       | 15       | 281      | 32       | 3        | 39      | 663     | 68      | 12      | 112     | 34      |

**Table 5. Whole-rock geochemistry of diorite intrusive series.**

Major and trace elements normalized to 100% anhydrous.

| Sample                         | CR 06-1 | CR 07-1 | CR 78-2 | CR 80-1 | CR 82-1 | CR 84-4 | CR 85-1 | CR 87-1 | CR 98-2 |
|--------------------------------|---------|---------|---------|---------|---------|---------|---------|---------|---------|
| SiO <sub>2</sub>               | 70.20   | 53.14   | 52.69   | 72.85   | 74.46   | 69.01   | 69.59   | 68.52   | 61.07   |
| TiO <sub>2</sub>               | 0.47    | 0.37    | 0.38    | 0.58    | 0.50    | 0.61    | 0.59    | 0.84    | 0.85    |
| Al <sub>2</sub> O <sub>3</sub> | 15.59   | 16.89   | 16.79   | 14.16   | 14.24   | 15.05   | 15.51   | 14.53   | 15.99   |
| FeO*                           | 3.40    | 6.41    | 6.53    | 1.83    | 1.47    | 3.73    | 3.47    | 3.19    | 6.67    |
| MnO                            | 0.03    | 0.15    | 0.15    | 0.04    | 0.02    | 0.05    | 0.05    | 0.05    | 0.10    |
| MgO                            | 1.51    | 9.74    | 10.05   | 1.21    | 1.01    | 2.16    | 2.19    | 2.20    | 4.67    |
| CaO                            | 3.32    | 10.51   | 10.66   | 2.19    | 2.16    | 2.72    | 2.87    | 4.12    | 6.34    |
| Na <sub>2</sub> O              | 4.87    | 2.29    | 2.26    | 6.56    | 5.61    | 6.19    | 5.02    | 5.35    | 3.85    |
| K <sub>2</sub> O               | 0.42    | 0.44    | 0.44    | 0.43    | 0.41    | 0.24    | 0.49    | 0.83    | 0.25    |
| P <sub>2</sub> O <sub>5</sub>  | 0.18    | 0.06    | 0.06    | 0.16    | 0.11    | 0.23    | 0.23    | 0.35    | 0.22    |
| LOI                            | 0.98    | 1.41    | 1.21    | 0.77    | 0.81    | 1.25    | 1.20    | 0.99    | 1.24    |
| Mg#                            | 44.16   | 73.02   | 73.28   | 54.18   | 55.11   | 50.77   | 52.88   | 55.17   | 55.48   |
|                                |         |         |         |         |         |         |         |         |         |
| Nb                             | 3       | 1.1     | 1.4     | 3.2     | 5.1     | 3.3     | 3.2     | 3.5     | 2.1     |
| Zr                             | 106     | 40      | 39      | 117     | 153     | 119     | 123     | 124     | 111     |
| Y                              | 30      | 13      | 13      | 22      | 27      | 29      | 28      | 38      | 44      |
| Sr                             | 422     | 342     | 339     | 420     | 352     | 317     | 421     | 365     | 415     |
| Rb                             | 4       | 4       | 5       | 5       | 3       | 2       | 6       | 10      | 2       |
| Sc                             | 13.5    | 37.7    | 33.4    | 12.5    | 6       | 7.9     | 15.8    | 14.8    | 24.5    |
| V                              | 13      | 174     | 185     | 57      | 40      | 44      | 59      | 50      | 221     |
| Cr                             | 0       | 32      | 34      | 26      | 28      | 18      | 30      | 5       | 51      |
| Ni                             | 0       | 45      | 44      | 0       | 2       | 0       | 1       | 1       | 11      |
| Cu                             | 0       | 3       | 1       | 0       | 0       | 0       | 339     | 0       | 1       |
| Zn                             | 4       | 25      | 28      | 5       | 2       | 4       | 4       | 5       | 21      |
| Ba                             | 118     | 127     | 132     | 74      | 101     | 94      | 167     | 220     | 81      |
|                                |         |         |         |         |         |         |         |         |         |
| CIPW normalizations            |         |         |         |         |         |         |         |         |         |
| Quartz (Q)                     | 28.86   |         |         | 26.29   | 33.55   | 20.99   | 27.22   | 22.08   | 13.74   |
| Corundum(C                     | 1.51    |         |         |         | 0.91    | 0.22    | 2.04    |         |         |
| Orthoclase(C                   | 2.50    | 2.59    | 2.58    | 2.56    | 2.42    | 1.41    | 2.88    | 4.90    | 1.48    |
| Albite(Ab)                     | 41.24   | 19.39   | 19.09   | 55.48   | 47.48   | 52.36   | 42.50   | 45.30   | 32.56   |
| Anorthite(An                   | 15.29   | 34.49   | 34.39   | 7.91    | 9.99    | 11.98   | 12.78   | 13.17   | 25.62   |
| Diopside(Di)                   |         | 13.98   | 14.67   | 1.54    |         |         |         | 4.12    | 3.63    |
| Hypersthene                    | 9.29    | 28.11   | 25.37   | 4.74    | 4.45    | 11.33   | 10.94   | 8.02    | 20.86   |
| Ilmenite(II)                   | 0.89    | 0.71    | 0.72    | 1.10    | 0.94    | 1.16    | 1.12    | 1.60    | 1.61    |
| Apatite(Ap)                    | 0.42    | 0.13    | 0.13    | 0.38    | 0.26    | 0.54    | 0.52    | 0.81    | 0.51    |

**Table 6. Whole-rock geochemistry of late stage intrusives analyzed by x-ray fluorescence.**

Major and trace elements normalized to 100% anhydrous.

| Sample | CR 07-3 | CR 100-1 | CR 100-2 | CR 10-2 | CR 10-3 | CR 75-1 | CR 76-1 | CR 81-2 | CR 82-2 | CR 82-2 | CR 82-3 | CR 84-6 | CR 85-3 | CR 87-2 | CR 90-2 | CR 98-1 | CR 98-3 | CR 99-3 |
|--------|---------|----------|----------|---------|---------|---------|---------|---------|---------|---------|---------|---------|---------|---------|---------|---------|---------|---------|
| SiO2   | 50.01   | 45.14    | 47.17    | 52.18   | 51.63   | 55.49   | 51.63   | 49.45   | 55.01   | 53.98   | 54.31   | 53.61   | 58.67   | 53.93   | 48.90   | 52.65   | 51.53   | 57.19   |
| TiO2   | 1.39    | 1.17     | 1.67     | 0.73    | 0.54    | 1.59    | 0.54    | 1.29    | 1.76    | 0.53    | 0.45    | 0.79    | 0.53    | 0.43    | 1.49    | 1.16    | 0.98    | 1.20    |
| Al2O3  | 14.41   | 12.93    | 15.14    | 13.99   | 12.56   | 14.55   | 12.56   | 14.94   | 13.77   | 16.94   | 17.27   | 15.16   | 16.46   | 12.49   | 14.68   | 13.84   | 13.73   | 14.43   |
| FeO*   | 12.88   | 11.20    | 13.61    | 8.61    | 10.08   | 10.91   | 10.08   | 4.18    | 8.90    | 13.39   | 12.85   | 12.88   | 10.72   | 9.21    | 13.27   | 10.93   | 9.59    | 9.45    |
| MnO    | 0.24    | 0.20     | 0.21     | 0.15    | 0.22    | 0.14    | 0.22    | 0.06    | 0.17    | 0.19    | 0.19    | 0.18    | 0.07    | 0.14    | 0.21    | 0.17    | 0.17    | 0.08    |
| MgO    | 12.27   | 11.83    | 7.02     | 8.66    | 11.97   | 6.93    | 11.97   | 12.93   | 5.04    | 9.85    | 9.87    | 9.84    | 6.74    | 13.52   | 8.84    | 8.98    | 10.06   | 5.92    |
| CaO    | 5.16    | 16.43    | 11.81    | 12.24   | 10.35   | 4.49    | 10.35   | 15.62   | 9.13    | 1.14    | 1.24    | 3.63    | 2.08    | 7.29    | 8.48    | 8.21    | 10.90   | 5.56    |
| Na2O   | 3.36    | 0.88     | 2.84     | 3.14    | 2.38    | 5.38    | 2.38    | 1.29    | 5.90    | 3.61    | 3.38    | 3.66    | 4.19    | 2.13    | 3.83    | 3.67    | 2.65    | 5.98    |
| K2O    | 0.11    | 0.07     | 0.24     | 0.20    | 0.21    | 0.17    | 0.21    | 0.05    | 0.10    | 0.23    | 0.31    | 0.11    | 0.35    | 0.79    | 0.00    | 0.25    | 0.25    | 0.02    |
| P2O5   | 0.17    | 0.14     | 0.29     | 0.09    | 0.07    | 0.37    | 0.07    | 0.20    | 0.22    | 0.14    | 0.12    | 0.15    | 0.19    | 0.06    | 0.30    | 0.13    | 0.14    | 0.18    |
| LOI    | 3.69    | 3.20     | 1.06     | 2.52    | 3.55    | 4.81    | 3.55    | 2.57    | 3.71    | 4.05    | 4.37    | 3.06    | 2.81    | 2.44    | 3.00    | 2.01    | 1.73    | 2.54    |
| Mg #   | 62.93   | 65.31    | 47.91    | 64.20   | 67.92   | 53.08   | 67.92   | 84.65   | 50.21   | 56.73   | 57.78   | 57.65   | 52.84   | 72.35   | 54.29   | 59.40   | 65.17   | 52.77   |
|        |         |          |          |         |         |         |         |         |         |         |         |         |         |         |         |         |         |         |
| Nb     | 1.7     | 0.8      | 0        | 1.9     | 0.7     | 5.3     | 4.6     | 1.5     | 2.5     | 2.5     | 2.3     | 2.9     | 1.9     | 1.8     | 3.3     | 1.8     | 2.4     | 2.4     |
| Zr     | 80      | 40       | 80       | 61      | 70      | 134     | 121     | 42      | 87      | 87      | 84      | 83      | 75      | 47      | 98      | 90      | 81      | 85      |
| Y      | 30      | 25       | 39       | 22      | 24      | 41      | 40      | 18      | 21      | 21      | 23      | 28      | 19      | 14      | 37      | 33      | 28      | 29      |
| Sr     | 279     | 231      | 643      | 312     | 888     | 172     | 164     | 151     | 226     | 226     | 263     | 282     | 402     | 239     | 105     | 362     | 343     | 44      |
| Rb     | 2       | 1        | 2        | 2       | 4       | 5       | 5       | 2       | 4       | 4       | 5       | 2       | 5       | 13      | 0       | 3       | 5       | 0       |
| Sc     | 19.8    | 38.2     | 34.1     | 34.5    | 34.1    | 20.7    | 30.9    | 21.7    | 14      | 14      | 15      | 19.9    | 18      | 32.4    | 22.8    | 32.4    | 34.7    | 25.3    |
| V      | 371     | 376      | 512      | 259     | 284     | 326     | 336     | 193     | 187     | 187     | 198     | 249     | 236     | 246     | 325     | 342     | 257     | 257     |
| Cr     | 86      | 142      | 35       | 42      | 178     | 26      | 186     | 280     | 29      | 29      | 30      | 37      | 11      | 430     | 55      | 36      | 80      | 15      |
| Ni     | 32      | 72       | 18       | 44      | 64      | 14      | 27      | 136     | 23      | 23      | 24      | 18      | 8       | 164     | 65      | 39      | 53      | 17      |
| Cu     | 24      | 78       | 77       | 9       | 51      | 55      | 40      | 798     | 2856    | 2856    | 2009    | 5       | 2       | 4       | 60      | 5       | 70      | 4       |
| Zn     | 20      | 75       | 85       | 38      | 38      | 82      | 73      | 76      | 25      | 25      | 26      | 20      | 11      | 22      | 91      | 31      | 59      | 12      |
| Ba     | 5       | 1087     | 5510     | 926     | 768     | 43      | 73      | 33      | 68      | 68      | 86      | 33      | 108     | 429     | 83      | 103     | 257     | 19      |

**Table 7. Whole-rock geochemistry for tuffaceous radiolarian cherts by XRF.**

Major and trace elements normalized to 100% anhydrous.

| Sample                         | CR 36-1 | CR 31-1 | CR 63-1 | CR 26-1 | CR 54-3 | CR 27-2 | CR 37-1 | CR 33-2 | CR 52-1 | CR 44-1 | CR 70-1 | CR 25-1 |
|--------------------------------|---------|---------|---------|---------|---------|---------|---------|---------|---------|---------|---------|---------|
| SiO <sub>2</sub>               | 83.05   | 82.93   | 79.30   | 81.25   | 91.73   | 84.25   | 85.88   | 87.61   | 80.25   | 84.19   | 94.12   | 84.99   |
| TiO <sub>2</sub>               | 0.22    | 0.25    | 0.29    | 0.25    | 0.00    | 0.25    | 0.19    | 0.15    | 0.29    | 0.23    | 0.07    | 0.26    |
| Al <sub>2</sub> O <sub>3</sub> | 7.73    | 8.52    | 10.59   | 8.58    | 4.40    | 6.92    | 7.74    | 7.36    | 9.46    | 6.56    | 2.78    | 8.14    |
| FeO*                           | 5.28    | 5.28    | 5.88    | 6.96    | 2.51    | 5.96    | 4.10    | 2.84    | 5.31    | 6.33    | 2.08    | 3.90    |
| MnO                            | 0.24    | 0.17    | 1.30    | 0.24    | 0.01    | 0.13    | 0.17    | 0.19    | 0.37    | 0.34    | 0.06    | 0.09    |
| MgO                            | 1.81    | 1.27    | 0.45    | 1.95    | 0.17    | 1.99    | 0.76    | 0.73    | 1.24    | 1.53    | 0.43    | 1.04    |
| CaO                            | 0.10    | 0.19    | 0.13    | 0.00    | 0.00    | 0.05    | 0.02    | 0.07    | 1.00    | 0.12    | 0.09    | 0.08    |
| Na <sub>2</sub> O              | 0.86    | 0.33    | 0.42    | 0.00    | 0.68    | 0.00    | 0.36    | 0.00    | 0.79    | 0.00    | 0.00    | 0.00    |
| K <sub>2</sub> O               | 0.66    | 0.87    | 1.41    | 0.62    | 0.39    | 0.30    | 0.65    | 0.95    | 1.12    | 0.60    | 0.09    | 1.29    |
| P <sub>2</sub> O <sub>5</sub>  | 0.06    | 0.20    | 0.21    | 0.15    | 0.10    | 0.15    | 0.12    | 0.09    | 0.17    | 0.10    | 0.29    | 0.22    |

Table 8. Pyroxene compositions, Mg#, suite, and formula per 6 oxygen.

| Sample Point | CR 29-2 pyx1 | CR 29-2 pyx2 | CR 29-2 pyx3 | CR 29-2 pyx4 | CR 29-2 pyx5 | CR 29-2 pyx6 | CR 29-2 pyx7 | CR 29-2 pyx8 | CR 29-1 pyx1 | CR 29-1 pyx2 | CR 29-1 pyx3 | CR 29-1 pyx4 | CR 29-1 pyx5 | CR 29-1 pyx6 | CR 29-1 pyx7 | CR 88-2 pyx8 | CR 88-2 pyx9 | CR 88-2 pyx10 | CR 88-2 pyx11 | CR 88-2 pyx12 | CR 88-2 pyx13 | CR 88-2 pyx14 | CR 88-2 pyx15 | CR 88-2 pyx16 | CR 88-2 pyx17 | CR 88-2 pyx18 | CR 88-2 pyx19 | CR 88-2 pyx20 | CR 88-2 pyx21 | CR 88-2 pyx22 | CR 88-2 pyx23 | CR 88-2 pyx24 | CR 88-2 pyx25 | CR 88-2 pyx26 | CR 88-2 pyx27 | CR 88-2 pyx28 | CR 88-2 pyx29 | CR 88-2 pyx30 | CR 88-2 pyx31 | CR 88-2 pyx32 | CR 88-2 pyx33 | CR 88-2 pyx34 | CR 88-2 pyx35 | CR 88-2 pyx36 | CR 88-2 pyx37 | CR 88-2 pyx38 | CR 88-2 pyx39 | CR 88-2 pyx40 | CR 88-2 pyx41 | CR 88-2 pyx42 | CR 88-2 pyx43 | CR 88-2 pyx44 | CR 88-2 pyx45 | CR 88-2 pyx46 | CR 88-2 pyx47 | CR 88-2 pyx48 | CR 88-2 pyx49 | CR 88-2 pyx50 | CR 88-2 pyx51 | CR 88-2 pyx52 | CR 88-2 pyx53 | CR 88-2 pyx54 | CR 88-2 pyx55 | CR 88-2 pyx56 | CR 88-2 pyx57 | CR 88-2 pyx58 | CR 88-2 pyx59 | CR 88-2 pyx60 | CR 88-2 pyx61 | CR 88-2 pyx62 | CR 88-2 pyx63 | CR 88-2 pyx64 | CR 88-2 pyx65 | CR 88-2 pyx66 | CR 88-2 pyx67 | CR 88-2 pyx68 | CR 88-2 pyx69 | CR 88-2 pyx70 | CR 88-2 pyx71 | CR 88-2 pyx72 | CR 88-2 pyx73 | CR 88-2 pyx74 | CR 88-2 pyx75 | CR 88-2 pyx76 | CR 88-2 pyx77 | CR 88-2 pyx78 | CR 88-2 pyx79 | CR 88-2 pyx80 | CR 88-2 pyx81 | CR 88-2 pyx82 | CR 88-2 pyx83 | CR 88-2 pyx84 | CR 88-2 pyx85 | CR 88-2 pyx86 | CR 88-2 pyx87 | CR 88-2 pyx88 | CR 88-2 pyx89 | CR 88-2 pyx90 | CR 88-2 pyx91 | CR 88-2 pyx92 | CR 88-2 pyx93 | CR 88-2 pyx94 | CR 88-2 pyx95 | CR 88-2 pyx96 | CR 88-2 pyx97 | CR 88-2 pyx98 | CR 88-2 pyx99 | CR 88-2 pyx100 | CR 88-2 pyx101 | CR 88-2 pyx102 | CR 88-2 pyx103 | CR 88-2 pyx104 | CR 88-2 pyx105 | CR 88-2 pyx106 | CR 88-2 pyx107 | CR 88-2 pyx108 | CR 88-2 pyx109 | CR 88-2 pyx110 | CR 88-2 pyx111 | CR 88-2 pyx112 | CR 88-2 pyx113 | CR 88-2 pyx114 | CR 88-2 pyx115 | CR 88-2 pyx116 | CR 88-2 pyx117 | CR 88-2 pyx118 | CR 88-2 pyx119 | CR 88-2 pyx120 | CR 88-2 pyx121 | CR 88-2 pyx122 | CR 88-2 pyx123 | CR 88-2 pyx124 | CR 88-2 pyx125 | CR 88-2 pyx126 | CR 88-2 pyx127 | CR 88-2 pyx128 | CR 88-2 pyx129 | CR 88-2 pyx130 | CR 88-2 pyx131 | CR 88-2 pyx132 | CR 88-2 pyx133 | CR 88-2 pyx134 | CR 88-2 pyx135 | CR 88-2 pyx136 | CR 88-2 pyx137 | CR 88-2 pyx138 | CR 88-2 pyx139 | CR 88-2 pyx140 | CR 88-2 pyx141 | CR 88-2 pyx142 | CR 88-2 pyx143 | CR 88-2 pyx144 | CR 88-2 pyx145 | CR 88-2 pyx146 | CR 88-2 pyx147 | CR 88-2 pyx148 | CR 88-2 pyx149 | CR 88-2 pyx150 | CR 88-2 pyx151 | CR 88-2 pyx152 | CR 88-2 pyx153 | CR 88-2 pyx154 | CR 88-2 pyx155 | CR 88-2 pyx156 | CR 88-2 pyx157 | CR 88-2 pyx158 | CR 88-2 pyx159 | CR 88-2 pyx160 | CR 88-2 pyx161 | CR 88-2 pyx162 | CR 88-2 pyx163 | CR 88-2 pyx164 | CR 88-2 pyx165 | CR 88-2 pyx166 | CR 88-2 pyx167 | CR 88-2 pyx168 | CR 88-2 pyx169 | CR 88-2 pyx170 | CR 88-2 pyx171 | CR 88-2 pyx172 | CR 88-2 pyx173 | CR 88-2 pyx174 | CR 88-2 pyx175 | CR 88-2 pyx176 | CR 88-2 pyx177 | CR 88-2 pyx178 | CR 88-2 pyx179 | CR 88-2 pyx180 | CR 88-2 pyx181 | CR 88-2 pyx182 | CR 88-2 pyx183 | CR 88-2 pyx184 | CR 88-2 pyx185 | CR 88-2 pyx186 | CR 88-2 pyx187 | CR 88-2 pyx188 | CR 88-2 pyx189 | CR 88-2 pyx190 | CR 88-2 pyx191 | CR 88-2 pyx192 | CR 88-2 pyx193 | CR 88-2 pyx194 | CR 88-2 pyx195 | CR 88-2 pyx196 | CR 88-2 pyx197 | CR 88-2 pyx198 | CR 88-2 pyx199 | CR 88-2 pyx200 | CR 88-2 pyx201 | CR 88-2 pyx202 | CR 88-2 pyx203 | CR 88-2 pyx204 | CR 88-2 pyx205 | CR 88-2 pyx206 | CR 88-2 pyx207 | CR 88-2 pyx208 | CR 88-2 pyx209 | CR 88-2 pyx210 | CR 88-2 pyx211 | CR 88-2 pyx212 | CR 88-2 pyx213 | CR 88-2 pyx214 | CR 88-2 pyx215 | CR 88-2 pyx216 | CR 88-2 pyx217 | CR 88-2 pyx218 | CR 88-2 pyx219 | CR 88-2 pyx220 | CR 88-2 pyx221 | CR 88-2 pyx222 | CR 88-2 pyx223 | CR 88-2 pyx224 | CR 88-2 pyx225 | CR 88-2 pyx226 | CR 88-2 pyx227 | CR 88-2 pyx228 | CR 88-2 pyx229 | CR 88-2 pyx230 | CR 88-2 pyx231 | CR 88-2 pyx232 | CR 88-2 pyx233 | CR 88-2 pyx234 | CR 88-2 pyx235 | CR 88-2 pyx236 | CR 88-2 pyx237 | CR 88-2 pyx238 | CR 88-2 pyx239 | CR 88-2 pyx240 | CR 88-2 pyx241 | CR 88-2 pyx242 | CR 88-2 pyx243 | CR 88-2 pyx244 | CR 88-2 pyx245 | CR 88-2 pyx246 | CR 88-2 pyx247 | CR 88-2 pyx248 | CR 88-2 pyx249 | CR 88-2 pyx250 | CR 88-2 pyx251 | CR 88-2 pyx252 | CR 88-2 pyx253 | CR 88-2 pyx254 | CR 88-2 pyx255 | CR 88-2 pyx256 | CR 88-2 pyx257 | CR 88-2 pyx258 | CR 88-2 pyx259 | CR 88-2 pyx260 | CR 88-2 pyx261 | CR 88-2 pyx262 | CR 88-2 pyx263 | CR 88-2 pyx264 | CR 88-2 pyx265 | CR 88-2 pyx266 | CR 88-2 pyx267 | CR 88-2 pyx268 | CR 88-2 pyx269 | CR 88-2 pyx270 | CR 88-2 pyx271 | CR 88-2 pyx272 | CR 88-2 pyx273 | CR 88-2 pyx274 | CR 88-2 pyx275 | CR 88-2 pyx276 | CR 88-2 pyx277 | CR 88-2 pyx278 | CR 88-2 pyx279 | CR 88-2 pyx280 | CR 88-2 pyx281 | CR 88-2 pyx282 | CR 88-2 pyx283 | CR 88-2 pyx284 | CR 88-2 pyx285 | CR 88-2 pyx286 | CR 88-2 pyx287 | CR 88-2 pyx288 | CR 88-2 pyx289 | CR 88-2 pyx290 | CR 88-2 pyx291 | CR 88-2 pyx292 | CR 88-2 pyx293 | CR 88-2 pyx294 | CR 88-2 pyx295 | CR 88-2 pyx296 | CR 88-2 pyx297 | CR 88-2 pyx298 | CR 88-2 pyx299 | CR 88-2 pyx300 | CR 88-2 pyx301 | CR 88-2 pyx302 | CR 88-2 pyx303 | CR 88-2 pyx304 | CR 88-2 pyx305 | CR 88-2 pyx306 | CR 88-2 pyx307 | CR 88-2 pyx308 | CR 88-2 pyx309 | CR 88-2 pyx310 | CR 88-2 pyx311 | CR 88-2 pyx312 | CR 88-2 pyx313 | CR 88-2 pyx314 | CR 88-2 pyx315 | CR 88-2 pyx316 | CR 88-2 pyx317 | CR 88-2 pyx318 | CR 88-2 pyx319 | CR 88-2 pyx320 | CR 88-2 pyx321 | CR 88-2 pyx322 | CR 88-2 pyx323 | CR 88-2 pyx324 | CR 88-2 pyx325 | CR 88-2 pyx326 | CR 88-2 pyx327 | CR 88-2 pyx328 | CR 88-2 pyx329 | CR 88-2 pyx330 | CR 88-2 pyx331 | CR 88-2 pyx332 | CR 88-2 pyx333 | CR 88-2 pyx334 | CR 88-2 pyx335 | CR 88-2 pyx336 | CR 88-2 pyx337 | CR 88-2 pyx338 | CR 88-2 pyx339 | CR 88-2 pyx340 | CR 88-2 pyx341 | CR 88-2 pyx342 | CR 88-2 pyx343 | CR 88-2 pyx344 | CR 88-2 pyx345 | CR 88-2 pyx346 | CR 88-2 pyx347 | CR 88-2 pyx348 | CR 88-2 pyx349 | CR 88-2 pyx350 | CR 88-2 pyx351 | CR 88-2 pyx352 | CR 88-2 pyx353 | CR 88-2 pyx354 | CR 88-2 pyx355 | CR 88-2 pyx356 | CR 88-2 pyx357 | CR 88-2 pyx358 | CR 88-2 pyx359 | CR 88-2 pyx360 | CR 88-2 pyx361 | CR 88-2 pyx362 | CR 88-2 pyx363 | CR 88-2 pyx364 | CR 88-2 pyx365 | CR 88-2 pyx366 | CR 88-2 pyx367 | CR 88-2 pyx368 | CR 88-2 pyx369 | CR 88-2 pyx370 | CR 88-2 pyx371 | CR 88-2 pyx372 | CR 88-2 pyx373 | CR 88-2 pyx374 | CR 88-2 pyx375 | CR 88-2 pyx376 | CR 88-2 pyx377 | CR 88-2 pyx378 | CR 88-2 pyx379 | CR 88-2 pyx380 | CR 88-2 pyx381 | CR 88-2 pyx382 | CR 88-2 pyx383 | CR 88-2 pyx384 | CR 88-2 pyx385 | CR 88-2 pyx386 | CR 88-2 pyx387 | CR 88-2 pyx388 | CR 88-2 pyx389 | CR 88-2 pyx390 | CR 88-2 pyx391 | CR 88-2 pyx392 | CR 88-2 pyx393 | CR 88-2 pyx394 | CR 88-2 pyx395 | CR 88-2 pyx396 | CR 88-2 pyx397 | CR 88-2 pyx398 | CR 88-2 pyx399 | CR 88-2 pyx400 | CR 88-2 pyx401 | CR 88-2 pyx402 | CR 88-2 pyx403 | CR 88-2 pyx404 | CR 88-2 pyx405 | CR 88-2 pyx406 | CR 88-2 pyx407 | CR 88-2 pyx408 | CR 88-2 pyx409 | CR 88-2 pyx410 | CR 88-2 pyx411 | CR 88-2 pyx412 | CR 88-2 pyx413 | CR 88-2 pyx414 | CR 88-2 pyx415 | CR 88-2 pyx416 | CR 88-2 pyx417 | CR 88-2 pyx418 | CR 88-2 pyx419 | CR 88-2 pyx420 | CR 88-2 pyx421 | CR 88-2 pyx422 | CR 88-2 pyx423 | CR 88-2 pyx424 | CR 88-2 pyx425 | CR 88-2 pyx426 | CR 88-2 pyx427 | CR 88-2 pyx428 | CR 88-2 pyx429 | CR 88-2 pyx430 | CR 88-2 pyx431 | CR 88-2 pyx432 | CR 88-2 pyx433 | CR 88-2 pyx434 | CR 88-2 pyx435 | CR 88-2 pyx436 | CR 88-2 pyx437 | CR 88-2 pyx438 | CR 88-2 pyx439 | CR 88-2 pyx440 | CR 88-2 pyx441 | CR 88-2 pyx442 | CR 88-2 pyx443 | CR 88-2 pyx444 | CR 88-2 pyx445 | CR 88-2 pyx446 | CR 88-2 pyx447 | CR 88-2 pyx448 | CR 88-2 pyx449 | CR 88-2 pyx450 | CR 88-2 pyx451 | CR 88-2 pyx452 | CR 88-2 pyx453 | CR 88-2 pyx454 | CR 88-2 pyx455 | CR 88-2 pyx456 | CR 88-2 pyx457 | CR 88-2 pyx458 | CR 88-2 pyx459 | CR 88-2 pyx460 | CR 88-2 pyx461 | CR 88-2 pyx462 | CR 88-2 pyx463 | CR 88-2 pyx464 | CR 88-2 pyx465 | CR 88-2 pyx466 | CR 88-2 pyx467 | CR 88-2 pyx468 | CR 88-2 pyx469 | CR 88-2 pyx470 | CR 88-2 pyx471 | CR 88-2 pyx472 | CR 88-2 pyx473 | CR 88-2 pyx474 | CR 88-2 pyx475 | CR 88-2 pyx476 | CR 88-2 pyx477 | CR 88-2 pyx478 | CR 88-2 pyx479 | CR 88-2 pyx480 | CR 88-2 pyx481 | CR 88-2 pyx482 | CR 88-2 pyx483 | CR 88-2 pyx484 | CR 88-2 pyx485 | CR 88-2 pyx486 | CR 88-2 pyx487 | CR 88-2 pyx488 | CR 88-2 pyx489 | CR 88-2 pyx490 | CR 88-2 pyx491 | CR 88-2 pyx492 | CR 88-2 pyx493 | CR 88-2 pyx494 | CR 88-2 pyx495 | CR 88-2 pyx496 | CR 88-2 pyx497 | CR 88-2 pyx498 | CR 88-2 pyx499 | CR 88-2 pyx500 | CR 88-2 pyx501 | CR 88-2 pyx502 | CR 88-2 pyx503 | CR 88-2 pyx504 | CR 88-2 pyx505 | CR 88-2 pyx506 | CR 88-2 pyx507 | CR 88-2 pyx508 | CR 88-2 pyx509 | CR 88-2 pyx510 | CR 88-2 pyx511 | CR 88-2 pyx512 | CR 88-2 pyx513 | CR 88-2 pyx514 | CR 88-2 pyx515 | CR 88-2 pyx516 | CR 88-2 pyx517 | CR 88-2 pyx518 | CR 88-2 pyx519 | CR 88-2 pyx520 | CR 88-2 pyx521 | CR 88-2 pyx522 | CR 88-2 pyx523 | CR 88-2 pyx524 | CR 88-2 pyx525 | CR 88-2 pyx526 | CR 88-2 pyx527 | CR 88-2 pyx528 | CR 88-2 pyx529 | CR 88-2 pyx530 | CR 88-2 pyx531 | CR 88-2 pyx532 | CR 88-2 pyx533 | CR 88-2 pyx534 | CR 88-2 pyx535 | CR 88-2 pyx536 | CR 88-2 pyx537 | CR 88-2 pyx538 | CR 88-2 pyx539 | CR 88-2 pyx540 | CR 88-2 pyx541 | CR 88-2 pyx542 | CR 88-2 pyx543 | CR 88-2 pyx544 | CR 88-2 pyx545 | CR 88-2 pyx546 | CR 88-2 pyx547 | CR 88-2 pyx548 | CR 88-2 pyx549 | CR 88-2 pyx550 | CR 88-2 pyx551 | CR 88-2 pyx552 | CR 88-2 pyx553 | CR 88-2 pyx554 | CR 88-2 pyx555 | CR 88-2 pyx556 | CR 88-2 pyx557 | CR 88-2 pyx558 | CR 88-2 pyx559 | CR 88-2 pyx560 | CR 88-2 pyx561 | CR 88-2 pyx562 | CR 88-2 pyx563 | CR 88-2 pyx564 | CR 88-2 pyx565 | CR 88-2 pyx566 | CR 88-2 pyx567 | CR 88-2 pyx568 | CR 88-2 pyx569 | CR 88-2 pyx570 | CR 88-2 pyx571 | CR 88-2 pyx572 | CR 88-2 pyx573 | CR 88-2 pyx574 | CR 88-2 pyx575 | CR 88-2 pyx576 | CR 88-2 pyx577 | CR 88-2 pyx578 | CR 88-2 pyx579 | CR 88-2 pyx580 | CR 88-2 pyx581 | CR 88-2 pyx582 | CR 88-2 pyx583 | CR 88-2 pyx584 | CR 88-2 pyx585 | CR 88-2 pyx586 | CR 88-2 pyx587 | CR 88-2 pyx588 | CR 88-2 pyx589 | CR 88-2 pyx590 | CR 88-2 pyx591 | CR 88-2 pyx592 | CR 88-2 pyx593 | CR 88-2 pyx594 | CR 88-2 pyx595 | CR 88-2 pyx596 | CR 88-2 pyx597 | CR 88-2 pyx598 | CR 88-2 pyx599 | CR 88-2 pyx600 | CR 88-2 pyx601 | CR 88-2 pyx602 | CR 88-2 pyx603 | CR 88-2 pyx604 | CR 88-2 pyx605 | CR 88-2 pyx606 | CR 88-2 pyx607 | CR 88-2 pyx608 | CR 88-2 pyx609 | CR 88-2 pyx610 | CR 88-2 pyx611 | CR 88-2 pyx612 | CR 88-2 pyx613 | CR 88-2 pyx614 | CR 88-2 pyx615 | CR 88-2 pyx616 | CR 88-2 pyx617 | CR 88-2 pyx618 | CR 88-2 pyx619 | CR 88-2 pyx620 | CR 88-2 pyx621 | CR 88-2 pyx622 | CR 88-2 pyx623 | CR 88-2 pyx624 | CR 88-2 pyx625 | CR 88-2 pyx626 | CR 88-2 pyx627 | CR 88-2 pyx628 | CR 88-2 pyx629 | CR 88-2 pyx630 | CR 88-2 pyx631 | CR 88-2 pyx632 | CR 88-2 pyx633 | CR 88-2 pyx634 | CR 88-2 pyx635 | CR 88-2 pyx636 | CR 88-2 pyx637 | CR 88-2 pyx638 | CR 88-2 pyx639 | CR 88-2 pyx640 | CR 88-2 pyx641 | CR 88-2 pyx642 | CR 88-2 pyx643 | CR 88-2 pyx644 | CR 88-2 pyx645 | CR 88-2 pyx646 | CR 88-2 pyx647 | CR 88-2 pyx648 | CR 88-2 pyx649 | CR 88-2 pyx650 | CR 88-2 pyx651 | CR 88-2 pyx652 | CR 88-2 pyx653 | CR 88-2 pyx654 | CR 88-2 pyx655 | CR 88-2 pyx656 | CR 88-2 pyx657 | CR 88-2 pyx658 | CR 88-2 pyx659 | CR 88-2 pyx660 | CR 88-2 pyx661 | CR 88-2 pyx662 | CR 88-2 pyx663 | CR 88-2 pyx664 | CR 88-2 pyx665 | CR 88-2 pyx666 | CR 88-2 pyx667 | CR 88-2 pyx668 | CR 88-2 pyx669 | CR 88-2 pyx670 | CR 88-2 pyx671 | CR 88-2 pyx672 | CR 88-2 pyx673 | CR 88-2 pyx674 | CR 88-2 pyx675 | CR 88-2 pyx676 | CR 88-2 pyx677 | CR 88-2 pyx678 | CR 88-2 pyx679 | CR 88-2 pyx680 | CR 88-2 pyx681 | CR 88-2 pyx682 | CR 88-2 pyx683 | CR 88-2 pyx684 | CR 88-2 pyx685 | CR 88-2 pyx686 | CR 88-2 pyx687 | CR 88-2 pyx688 | CR 88-2 pyx689 | CR 88-2 pyx690 | CR 88-2 pyx691 | CR 88-2 pyx692 | CR 88-2 pyx693 | CR 88-2 pyx694 | CR 88-2 pyx695 | CR 88-2 pyx696 | CR 88-2 pyx697 | CR 88-2 pyx698 | CR 88-2 pyx699 | CR 88-2 pyx700 | CR 88-2 pyx701 | CR 88-2 pyx702 | CR 88-2 pyx703 | CR 88-2 pyx704 | CR 88-2 pyx705 | CR 88-2 pyx706 | CR 88-2 pyx707 | CR 88-2 pyx708 | CR 88-2 pyx709 | CR 88-2 pyx710 | CR 88-2 pyx711 | CR |
|--------------|--------------|--------------|--------------|--------------|--------------|--------------|--------------|--------------|--------------|--------------|--------------|--------------|--------------|--------------|--------------|--------------|--------------|---------------|---------------|---------------|---------------|---------------|---------------|---------------|---------------|---------------|---------------|---------------|---------------|---------------|---------------|---------------|---------------|---------------|---------------|---------------|---------------|---------------|---------------|---------------|---------------|---------------|---------------|---------------|---------------|---------------|---------------|---------------|---------------|---------------|---------------|---------------|---------------|---------------|---------------|---------------|---------------|---------------|---------------|---------------|---------------|---------------|---------------|---------------|---------------|---------------|---------------|---------------|---------------|---------------|---------------|---------------|---------------|---------------|---------------|---------------|---------------|---------------|---------------|---------------|---------------|---------------|---------------|---------------|---------------|---------------|---------------|---------------|---------------|---------------|---------------|---------------|---------------|---------------|---------------|---------------|---------------|---------------|---------------|---------------|---------------|---------------|---------------|---------------|---------------|---------------|---------------|----------------|----------------|----------------|----------------|----------------|----------------|----------------|----------------|----------------|----------------|----------------|----------------|----------------|----------------|----------------|----------------|----------------|----------------|----------------|----------------|----------------|----------------|----------------|----------------|----------------|----------------|----------------|----------------|----------------|----------------|----------------|----------------|----------------|----------------|----------------|----------------|----------------|----------------|----------------|----------------|----------------|----------------|----------------|----------------|----------------|----------------|----------------|----------------|----------------|----------------|----------------|----------------|----------------|----------------|----------------|----------------|----------------|----------------|----------------|----------------|----------------|----------------|----------------|----------------|----------------|----------------|----------------|----------------|----------------|----------------|----------------|----------------|----------------|----------------|----------------|----------------|----------------|----------------|----------------|----------------|----------------|----------------|----------------|----------------|----------------|----------------|----------------|----------------|----------------|----------------|----------------|----------------|----------------|----------------|----------------|----------------|----------------|----------------|----------------|----------------|----------------|----------------|----------------|----------------|----------------|----------------|----------------|----------------|----------------|----------------|----------------|----------------|----------------|----------------|----------------|----------------|----------------|----------------|----------------|----------------|----------------|----------------|----------------|----------------|----------------|----------------|----------------|----------------|----------------|----------------|----------------|----------------|----------------|----------------|----------------|----------------|----------------|----------------|----------------|----------------|----------------|----------------|----------------|----------------|----------------|----------------|----------------|----------------|----------------|----------------|----------------|----------------|----------------|----------------|----------------|----------------|----------------|----------------|----------------|----------------|----------------|----------------|----------------|----------------|----------------|----------------|----------------|----------------|----------------|----------------|----------------|----------------|----------------|----------------|----------------|----------------|----------------|----------------|----------------|----------------|----------------|----------------|----------------|----------------|----------------|----------------|----------------|----------------|----------------|----------------|----------------|----------------|----------------|----------------|----------------|----------------|----------------|----------------|----------------|----------------|----------------|----------------|----------------|----------------|----------------|----------------|----------------|----------------|----------------|----------------|----------------|----------------|----------------|----------------|----------------|----------------|----------------|----------------|----------------|----------------|----------------|----------------|----------------|----------------|----------------|----------------|----------------|----------------|----------------|----------------|----------------|----------------|----------------|----------------|----------------|----------------|----------------|----------------|----------------|----------------|----------------|----------------|----------------|----------------|----------------|----------------|----------------|----------------|----------------|----------------|----------------|----------------|----------------|----------------|----------------|----------------|----------------|----------------|----------------|----------------|----------------|----------------|----------------|----------------|----------------|----------------|----------------|----------------|----------------|----------------|----------------|----------------|----------------|----------------|----------------|----------------|----------------|----------------|----------------|----------------|----------------|----------------|----------------|----------------|----------------|----------------|----------------|----------------|----------------|----------------|----------------|----------------|----------------|----------------|----------------|----------------|----------------|----------------|----------------|----------------|----------------|----------------|----------------|----------------|----------------|----------------|----------------|----------------|----------------|----------------|----------------|----------------|----------------|----------------|----------------|----------------|----------------|----------------|----------------|----------------|----------------|----------------|----------------|----------------|----------------|----------------|----------------|----------------|----------------|----------------|----------------|----------------|----------------|----------------|----------------|----------------|----------------|----------------|----------------|----------------|----------------|----------------|----------------|----------------|----------------|----------------|----------------|----------------|----------------|----------------|----------------|----------------|----------------|----------------|----------------|----------------|----------------|----------------|----------------|----------------|----------------|----------------|----------------|----------------|----------------|----------------|----------------|----------------|----------------|----------------|----------------|----------------|----------------|----------------|----------------|----------------|----------------|----------------|----------------|----------------|----------------|----------------|----------------|----------------|----------------|----------------|----------------|----------------|----------------|----------------|----------------|----------------|----------------|----------------|----------------|----------------|----------------|----------------|----------------|----------------|----------------|----------------|----------------|----------------|----------------|----------------|----------------|----------------|----------------|----------------|----------------|----------------|----------------|----------------|----------------|----------------|----------------|----------------|----------------|----------------|----------------|----------------|----------------|----------------|----------------|----------------|----------------|----------------|----------------|----------------|----------------|----------------|----------------|----------------|----------------|----------------|----------------|----------------|----------------|----------------|----------------|----------------|----------------|----------------|----------------|----------------|----------------|----------------|----------------|----------------|----------------|----------------|----------------|----------------|----------------|----------------|----------------|----------------|----------------|----------------|----------------|----------------|----------------|----------------|----------------|----------------|----------------|----------------|----------------|----------------|----------------|----------------|----------------|----------------|----------------|----------------|----------------|----------------|----------------|----------------|----------------|----------------|----------------|----------------|----------------|----------------|----------------|----------------|----------------|----------------|----------------|----------------|----------------|----------------|----------------|----------------|----------------|----------------|----------------|----------------|----------------|----------------|----------------|----------------|----------------|----------------|----------------|----------------|----------------|----------------|----------------|----------------|----------------|----------------|----------------|----------------|----------------|----------------|----------------|----------------|----------------|----------------|----------------|----------------|----------------|----------------|----------------|----------------|----------------|----------------|----------------|----------------|----------------|----------------|----------------|----------------|----------------|----------------|----------------|----------------|----------------|----------------|----------------|----------------|----------------|----------------|----------------|----------------|----------------|----------------|----------------|----------------|----------------|----------------|----------------|----------------|----------------|----------------|----------------|----------------|----------------|----------------|----------------|----------------|----------------|----------------|----------------|----------------|----------------|----------------|----------------|----------------|----------------|----------------|----------------|----------------|----------------|----------------|----------------|----------------|----------------|----------------|----------------|----------------|----------------|----------------|----------------|----------------|----------------|----------------|----------------|----------------|----------------|----------------|----------------|----------------|----------------|----------------|----------------|----------------|----------------|----------------|----------------|----------------|----------------|----------------|----------------|----------------|----------------|----------------|----------------|----------------|----|
|--------------|--------------|--------------|--------------|--------------|--------------|--------------|--------------|--------------|--------------|--------------|--------------|--------------|--------------|--------------|--------------|--------------|--------------|---------------|---------------|---------------|---------------|---------------|---------------|---------------|---------------|---------------|---------------|---------------|---------------|---------------|---------------|---------------|---------------|---------------|---------------|---------------|---------------|---------------|---------------|---------------|---------------|---------------|---------------|---------------|---------------|---------------|---------------|---------------|---------------|---------------|---------------|---------------|---------------|---------------|---------------|---------------|---------------|---------------|---------------|---------------|---------------|---------------|---------------|---------------|---------------|---------------|---------------|---------------|---------------|---------------|---------------|---------------|---------------|---------------|---------------|---------------|---------------|---------------|---------------|---------------|---------------|---------------|---------------|---------------|---------------|---------------|---------------|---------------|---------------|---------------|---------------|---------------|---------------|---------------|---------------|---------------|---------------|---------------|---------------|---------------|---------------|---------------|---------------|---------------|---------------|---------------|---------------|----------------|----------------|----------------|----------------|----------------|----------------|----------------|----------------|----------------|----------------|----------------|----------------|----------------|----------------|----------------|----------------|----------------|----------------|----------------|----------------|----------------|----------------|----------------|----------------|----------------|----------------|----------------|----------------|----------------|----------------|----------------|----------------|----------------|----------------|----------------|----------------|----------------|----------------|----------------|----------------|----------------|----------------|----------------|----------------|----------------|----------------|----------------|----------------|----------------|----------------|----------------|----------------|----------------|----------------|----------------|----------------|----------------|----------------|----------------|----------------|----------------|----------------|----------------|----------------|----------------|----------------|----------------|----------------|----------------|----------------|----------------|----------------|----------------|----------------|----------------|----------------|----------------|----------------|----------------|----------------|----------------|----------------|----------------|----------------|----------------|----------------|----------------|----------------|----------------|----------------|----------------|----------------|----------------|----------------|----------------|----------------|----------------|----------------|----------------|----------------|----------------|----------------|----------------|----------------|----------------|----------------|----------------|----------------|----------------|----------------|----------------|----------------|----------------|----------------|----------------|----------------|----------------|----------------|----------------|----------------|----------------|----------------|----------------|----------------|----------------|----------------|----------------|----------------|----------------|----------------|----------------|----------------|----------------|----------------|----------------|----------------|----------------|----------------|----------------|----------------|----------------|----------------|----------------|----------------|----------------|----------------|----------------|----------------|----------------|----------------|----------------|----------------|----------------|----------------|----------------|----------------|----------------|----------------|----------------|----------------|----------------|----------------|----------------|----------------|----------------|----------------|----------------|----------------|----------------|----------------|----------------|----------------|----------------|----------------|----------------|----------------|----------------|----------------|----------------|----------------|----------------|----------------|----------------|----------------|----------------|----------------|----------------|----------------|----------------|----------------|----------------|----------------|----------------|----------------|----------------|----------------|----------------|----------------|----------------|----------------|----------------|----------------|----------------|----------------|----------------|----------------|----------------|----------------|----------------|----------------|----------------|----------------|----------------|----------------|----------------|----------------|----------------|----------------|----------------|----------------|----------------|----------------|----------------|----------------|----------------|----------------|----------------|----------------|----------------|----------------|----------------|----------------|----------------|----------------|----------------|----------------|----------------|----------------|----------------|----------------|----------------|----------------|----------------|----------------|----------------|----------------|----------------|----------------|----------------|----------------|----------------|----------------|----------------|----------------|----------------|----------------|----------------|----------------|----------------|----------------|----------------|----------------|----------------|----------------|----------------|----------------|----------------|----------------|----------------|----------------|----------------|----------------|----------------|----------------|----------------|----------------|----------------|----------------|----------------|----------------|----------------|----------------|----------------|----------------|----------------|----------------|----------------|----------------|----------------|----------------|----------------|----------------|----------------|----------------|----------------|----------------|----------------|----------------|----------------|----------------|----------------|----------------|----------------|----------------|----------------|----------------|----------------|----------------|----------------|----------------|----------------|----------------|----------------|----------------|----------------|----------------|----------------|----------------|----------------|----------------|----------------|----------------|----------------|----------------|----------------|----------------|----------------|----------------|----------------|----------------|----------------|----------------|----------------|----------------|----------------|----------------|----------------|----------------|----------------|----------------|----------------|----------------|----------------|----------------|----------------|----------------|----------------|----------------|----------------|----------------|----------------|----------------|----------------|----------------|----------------|----------------|----------------|----------------|----------------|----------------|----------------|----------------|----------------|----------------|----------------|----------------|----------------|----------------|----------------|----------------|----------------|----------------|----------------|----------------|----------------|----------------|----------------|----------------|----------------|----------------|----------------|----------------|----------------|----------------|----------------|----------------|----------------|----------------|----------------|----------------|----------------|----------------|----------------|----------------|----------------|----------------|----------------|----------------|----------------|----------------|----------------|----------------|----------------|----------------|----------------|----------------|----------------|----------------|----------------|----------------|----------------|----------------|----------------|----------------|----------------|----------------|----------------|----------------|----------------|----------------|----------------|----------------|----------------|----------------|----------------|----------------|----------------|----------------|----------------|----------------|----------------|----------------|----------------|----------------|----------------|----------------|----------------|----------------|----------------|----------------|----------------|----------------|----------------|----------------|----------------|----------------|----------------|----------------|----------------|----------------|----------------|----------------|----------------|----------------|----------------|----------------|----------------|----------------|----------------|----------------|----------------|----------------|----------------|----------------|----------------|----------------|----------------|----------------|----------------|----------------|----------------|----------------|----------------|----------------|----------------|----------------|----------------|----------------|----------------|----------------|----------------|----------------|----------------|----------------|----------------|----------------|----------------|----------------|----------------|----------------|----------------|----------------|----------------|----------------|----------------|----------------|----------------|----------------|----------------|----------------|----------------|----------------|----------------|----------------|----------------|----------------|----------------|----------------|----------------|----------------|----------------|----------------|----------------|----------------|----------------|----------------|----------------|----------------|----------------|----------------|----------------|----------------|----------------|----------------|----------------|----------------|----------------|----------------|----------------|----------------|----------------|----------------|----------------|----------------|----------------|----------------|----------------|----------------|----------------|----------------|----------------|----------------|----------------|----------------|----------------|----------------|----------------|----------------|----------------|----------------|----------------|----------------|----------------|----------------|----------------|----------------|----------------|----------------|----------------|----------------|----------------|----------------|----------------|----------------|----------------|----------------|----------------|----------------|----------------|----------------|----------------|----------------|----------------|----------------|----------------|----------------|----------------|----------------|----------------|----------------|----------------|----------------|----------------|----------------|----------------|----------------|----------------|----------------|----------------|----------------|----------------|----------------|----------------|----------------|----------------|----------------|----------------|----------------|----------------|----------------|----------------|----------------|----------------|----------------|----------------|----------------|----------------|----------------|----------------|----------------|----------------|----------------|----|



**Table 9. Olivine chemistry, suite, and Fo content.**

| Sample                          | CR 99-1         | CR 10-1         | CR 114-3      |
|---------------------------------|-----------------|-----------------|-----------------|-----------------|-----------------|-----------------|---------------|
| Point                           | oliv1           | oliv2           | oliv3           | oliv4           | oliv5           | oliv1           | oliv1         |
| <i>Suite</i>                    | <i>wehrlite</i> | <i>wehrlite</i> | <i>wehrlite</i> | <i>wehrlite</i> | <i>wehrlite</i> | <i>wehrlite</i> | <i>mantle</i> |
| SiO <sub>2</sub>                | 40.730          | 40.443          | 40.559          | 40.540          | 40.542          | 40.580          | 38.961        |
| TiO <sub>2</sub>                | 0.055           | 0.005           | 0.065           | 0.060           | 0.000           | 0.000           | 0.112         |
| FeO*                            | 13.697          | 13.813          | 13.533          | 14.095          | 13.913          | 16.861          | 12.622        |
| MnO                             | 0.096           | 0.239           | 0.269           | 0.319           | 0.320           | 0.243           | 0.092         |
| MgO                             | 46.201          | 45.636          | 45.883          | 45.672          | 45.848          | 43.589          | 43.576        |
| CaO                             | 0.034           | 0.055           | 0.069           | 0.178           | 0.072           | 0.048           | 0.027         |
| Cr <sub>2</sub> O <sub>3</sub>  | 0.026           | 0.016           | 0.054           | 0.012           | 0.037           | 0.018           | 0.013         |
| SUM                             | 100.839         | 100.207         | 100.431         | 100.875         | 100.732         | 101.337         | 95.402        |
| <br>Fo                          | <br>85.736      | <br>85.481      | <br>85.799      | <br>85.238      | <br>85.449      | <br>82.165      | <br>86.018    |
| <br><i>Formula per 4 oxygen</i> |                 |                 |                 |                 |                 |                 |               |
| Si                              | 1.006           | 1.006           | 1.006           | 1.004           | 1.004           | 1.011           | 1.014         |
| Ti                              | 0.001           | 0.000           | 0.001           | 0.001           | 0.000           | 0.000           | 0.002         |
| Fe                              | 0.283           | 0.287           | 0.281           | 0.292           | 0.288           | 0.351           | 0.275         |
| Mn                              | 0.002           | 0.005           | 0.006           | 0.007           | 0.007           | 0.005           | 0.002         |
| Mg                              | 1.700           | 1.692           | 1.696           | 1.685           | 1.693           | 1.619           | 1.690         |
| Ca                              | 0.001           | 0.001           | 0.002           | 0.005           | 0.002           | 0.001           | 0.001         |
| Cr                              | 0.000           | 0.000           | 0.001           | 0.000           | 0.000           | 0.000           | 0.000         |

Table 10. Hornblende chemistry

| Sample Point        | CR 88-2<br>hbl1 | CR 88-2<br>hbl2 | CR 88-2<br>hbl3 | CR 88-2<br>hbl4 | CR 88-2<br>hbl5 | CR 88-2<br>hbl6 | CR 10-1<br>hbl1 | CR 10-1<br>hbl2 | CR 10-1<br>hbl3 | CR 10-1<br>hbl4 | CR 87-1<br>hbl1 | CR 87-1<br>hbl2 | CR 88-2<br>hbl1 | CR 88-2<br>hbl2 | CR 88-2<br>hbl3 | CR 88-2<br>hbl4 | CR 10-3<br>hbl1 | CR 10-3<br>hbl2 | CR 10-3<br>hbl3 | CR 10-3<br>hbl4 | CR 10-3<br>hbl5 | CR 10-3<br>hbl6 | CR 10-3<br>hbl7 | CR 10-3<br>hbl8 |
|---------------------|-----------------|-----------------|-----------------|-----------------|-----------------|-----------------|-----------------|-----------------|-----------------|-----------------|-----------------|-----------------|-----------------|-----------------|-----------------|-----------------|-----------------|-----------------|-----------------|-----------------|-----------------|-----------------|-----------------|-----------------|
| Suite               | diorite         | diorite         | late dike       | wehrlite        |
| SiO2                | 48.522          | 48.522          | 51.37           | 52.72           | 52.24           | 53.03           | 52.30           | 51.91           | 54.08           | 53.81           | 51.71           | 44.438          | 44.285          | 47.415          | 43.636          | 44.306          | 45.589          | 44.558          | 45.235          | 45.878          | 45.549          | 47.505          | 47.505          | 49.79           |
| TiO2                | 0.220           | 0.220           | 0.39            | 0.43            | 0.41            | 0.37            | 0.39            | 0.46            | 0.15            | 0.20            | 0.25            | 3.154           | 2.894           | 1.371           | 2.394           | 2.399           | 2.175           | 2.204           | 2.075           | 0.579           | 1.043           | 0.390           | 0.390           | 1.18            |
| Al2O3               | 6.865           | 6.865           | 4.40            | 2.97            | 2.78            | 2.81            | 3.12            | 3.04            | 2.32            | 2.46            | 3.48            | 8.971           | 8.699           | 7.927           | 8.901           | 8.971           | 9.130           | 8.940           | 9.082           | 8.861           | 8.740           | 8.099           | 8.099           | 5.32            |
| FeO*                | 18.200          | 18.200          | 16.06           | 15.51           | 16.58           | 13.95           | 14.42           | 14.83           | 12.35           | 12.77           | 14.62           | 7.827           | 8.010           | 7.227           | 7.819           | 7.954           | 7.885           | 7.472           | 7.419           | 8.259           | 8.628           | 7.549           | 7.549           | 6.40            |
| MnO                 | 0.347           | 0.347           | 0.46            | 0.59            | 0.48            | 0.32            | 0.42            | 0.44            | 0.36            | 0.30            | 0.29            | 0.099           | 0.077           | 0.030           | 0.049           | 0.071           | 0.061           | 0.052           | 0.090           | 0.139           | 0.088           | 0.093           | 0.093           | 0.09            |
| MgO                 | 12.048          | 12.048          | 12.46           | 14.59           | 13.60           | 14.16           | 14.67           | 14.29           | 15.65           | 15.43           | 13.18           | 16.017          | 16.218          | 17.551          | 16.047          | 16.125          | 16.767          | 15.820          | 16.805          | 17.100          | 17.714          | 17.626          | 17.626          | 16.54           |
| CaO                 | 8.691           | 8.691           | 11.55           | 10.72           | 11.26           | 12.52           | 11.36           | 11.47           | 12.29           | 12.23           | 12.44           | 11.886          | 11.903          | 12.087          | 12.034          | 11.823          | 11.837          | 11.924          | 11.676          | 11.689          | 10.898          | 12.171          | 12.171          | 16.44           |
| Cr2O3               | 0.001           | 0.001           | 0.01            | 0.02            | 0.03            | 0.00            | 0.07            | 0.05            | 0.05            | 0.02            | 0.05            | 0.313           | 0.313           | 0.381           | 0.346           | 0.308           | 0.387           | 1.299           | 1.358           | 0.362           | 0.509           | 0.313           | 0.313           | 0.74            |
| Na2O                | 0.369           | 0.369           | 0.33            | 0.27            | 0.32            | 0.16            | 0.32            | 0.28            | 0.16            | 0.20            | 0.27            | 2.436           | 2.341           | 1.917           | 2.325           | 2.334           | 2.291           | 2.448           | 2.519           | 2.485           | 2.371           | 1.872           | 1.872           | 1.25            |
| K2O                 | 0.326           | 0.326           | 0.08            | 0.10            | 0.18            | 0.02            | 0.10            | 0.10            | 0.06            | 0.06            | 0.04            | 0.300           | 0.312           | 0.063           | 0.295           | 0.290           | 0.322           | 0.435           | 0.299           | 0.401           | 0.324           | 0.454           | 0.454           | 0.14            |
| SUM                 | 95.590          | 95.590          | 97.11           | 97.93           | 97.90           | 97.34           | 97.17           | 96.89           | 97.48           | 97.48           | 96.33           | 95.441          | 95.051          | 95.970          | 93.846          | 94.582          | 96.444          | 95.151          | 96.558          | 95.754          | 95.863          | 96.072          | 96.072          | 97.88           |
| recalculated values |                 |                 |                 |                 |                 |                 |                 |                 |                 |                 |                 |                 |                 |                 |                 |                 |                 |                 |                 |                 |                 |                 |                 |                 |
| Si                  | 6.585           | 6.588           | 6.862           | 6.561           | 6.606           | 6.660           | 6.611           | 6.567           | 6.732           | 6.365           | 7.752           | 7.752           | 6.543           | 6.954           | 7.224           | 7.414           | 7.584           | 7.612           | 7.758           | 7.690           | 7.616           | 7.724           | 7.762           | 7.682           |
| Al                  | 1.415           | 1.412           | 1.138           | 1.439           | 1.394           | 1.340           | 1.389           | 1.433           | 1.268           | 1.635           | 0.248           | 0.248           | 1.457           | 1.046           | 0.776           | 0.586           | 0.416           | 0.388           | 0.242           | 0.310           | 0.384           | 0.276           | 0.238           | 0.318           |
| Ti                  | 0.324           | 0.352           | 0.149           | 0.271           | 0.269           | 0.239           | 0.246           | 0.227           | 0.064           | 0.110           | 0.026           | 0.026           | 0.040           | 0.043           | 0.128           | 0.009           | 0.043           | 0.047           | 0.046           | 0.040           | 0.043           | 0.052           | 0.017           | 0.022           |
| Al                  | 0.110           | 0.156           | 0.214           | 0.139           | 0.183           | 0.232           | 0.174           | 0.121           | 0.265           | 0.000           | 1.045           | 1.045           | 0.000           | 0.351           | 0.134           | 0.000           | 0.349           | 0.118           | 0.244           | 0.170           | 0.152           | 0.257           | 0.156           | 0.097           |
| Fe                  | 0.996           | 0.970           | 0.875           | 0.983           | 0.992           | 0.963           | 0.927           | 0.901           | 1.014           | 1.008           | 2.432           | 2.432           | 0.870           | 0.924           | 0.776           | 0.420           | 1.983           | 1.872           | 2.059           | 1.692           | 1.755           | 1.846           | 1.483           | 1.525           |
| Mn                  | 0.010           | 0.012           | 0.004           | 0.006           | 0.009           | 0.008           | 0.006           | 0.011           | 0.017           | 0.010           | 0.047           | 0.047           | 0.011           | 0.012           | 0.011           | 0.012           | 0.058           | 0.073           | 0.061           | 0.039           | 0.052           | 0.056           | 0.044           | 0.036           |
| Mg                  | 3.594           | 3.539           | 3.785           | 3.596           | 3.583           | 3.650           | 3.498           | 3.636           | 3.740           | 3.689           | 2.869           | 2.869           | 3.618           | 3.845           | 3.577           | 4.280           | 2.741           | 3.140           | 3.009           | 3.061           | 3.182           | 3.168           | 3.348           | 3.282           |
| Ca                  | 1.896           | 1.888           | 1.874           | 1.939           | 1.889           | 1.853           | 1.895           | 1.816           | 1.838           | 1.632           | 1.488           | 1.488           | 1.796           | 1.909           | 2.556           | 1.797           | 1.828           | 1.658           | 1.792           | 1.946           | 1.772           | 1.829           | 1.891           | 1.871           |
| Cr                  | 0.037           | 0.037           | 0.044           | 0.041           | 0.036           | 0.045           | 0.152           | 0.156           | 0.042           | 0.056           | 0.000           | 0.000           | 0.034           | 0.036           | 0.084           | 0.010           | 0.002           | 0.002           | 0.004           | 0.000           | 0.008           | 0.006           | 0.006           | 0.002           |
| Na                  | 0.675           | 0.700           | 0.538           | 0.678           | 0.675           | 0.649           | 0.704           | 0.709           | 0.707           | 0.643           | 0.114           | 0.114           | 0.500           | 0.532           | 0.352           | 0.063           | 0.093           | 0.075           | 0.094           | 0.045           | 0.089           | 0.081           | 0.045           | 0.055           |
| K                   | 0.059           | 0.057           | 0.012           | 0.057           | 0.055           | 0.060           | 0.082           | 0.055           | 0.075           | 0.058           | 0.067           | 0.067           | 0.080           | 0.085           | 0.026           | 0.000           | 0.015           | 0.019           | 0.035           | 0.004           | 0.019           | 0.020           | 0.010           | 0.010           |

**Table 11. Plagioclase chemistry, suite, and An content.**

| Sample                         | CR 29-2         | CR 87-1        | CR 87-1        | CR 87-1        | CR 75-1          |
|--------------------------------|-----------------|----------------|----------------|----------------|------------------|
| Point                          | plag1           | plag1          | plag2          | plag3          | plag1            |
| Suite                          | <i>volcanic</i> | <i>diorite</i> | <i>diorite</i> | <i>diorite</i> | <i>late dike</i> |
| SiO <sub>2</sub>               | 67.56           | 67.48          | 66.82          | 68.37          | 67.05            |
| TiO <sub>2</sub>               | 0.00            | 0.05           | 0.17           | 0.00           | 0.01             |
| Al <sub>2</sub> O <sub>3</sub> | 20.71           | 21.42          | 21.55          | 20.22          | 15.57            |
| FeO*                           | 0.16            | 0.44           | 0.63           | 0.20           | 0.49             |
| MnO                            | 0.23            | 0.30           | 0.01           | 0.05           | 0.00             |
| MgO                            | 0.11            | 0.11           | 0.35           | 0.00           | 0.13             |
| CaO                            | 0.52            | 0.51           | 1.10           | 0.46           | 0.18             |
| Cr <sub>2</sub> O <sub>3</sub> | 0.01            | 0.00           | 0.02           | 0.00           | 0.00             |
| Na <sub>2</sub> O              | 11.22           | 10.62          | 10.47          | 11.34          | 10.71            |
| K <sub>2</sub> O               | 0.19            | 0.80           | 0.25           | 0.05           | 0.13             |
| SUM                            | 100.71          | 101.73         | 101.37         | 100.69         | 94.28            |
|                                |                 |                |                |                |                  |
| An                             | 4.82            | 4.81           | 10.25          | 4.24           | 1.77             |

Table 12. REE data from ICP-MS for Cuesta Ridge samples.

| Sample | CR 80-1 | CR 80-1 * | CR 78-2 | CR 78-2 * | CR 09-2 | CR 20-1 | CR 08-1 | CR 79-1 | CR 68-1 | CR 07-1 | CR 10-1 | CR 30-2 | CR 88-2 | CR 98-2 | CR 98-2 * | CR 4-1 | CR 73-3 | CR 75-1 | CR 90-2 | CR 40-1 | CR 43-1 | CR 64-2 | CR 07-3 | CR 46-1 | CR 100-1 | CR 114-2 | CR 21-1 | CR 87-1 | CR 22-1 | CR 32-1 | CR 3-2 | CR 42-1 | CR 99-1 | CR 33-1 |
|--------|---------|-----------|---------|-----------|---------|---------|---------|---------|---------|---------|---------|---------|---------|---------|-----------|--------|---------|---------|---------|---------|---------|---------|---------|---------|----------|----------|---------|---------|---------|---------|--------|---------|---------|---------|
| La ppm | 5.38    | 5.45      | 8.65    | 8.85      | 0.61    | 6.76    | 3.82    | 3.10    | 2.67    | 2.44    | 0.42    | 5.11    | 0.93    | 7.13    | 7.21      | 5.25   | 6.89    | 5.53    | 5.15    | 3.46    | 2.25    | 5.12    | 3.37    | 4.36    | 2.05     | 0.64     | 5.35    | 7.07    | 6.60    | 6.73    | 1.52   | 3.44    | 0.22    | 6.51    |
| Ce ppm | 12.22   | 12.08     | 17.89   | 18.15     | 1.74    | 18.06   | 10.54   | 5.96    | 6.15    | 5.34    | 1.25    | 14.26   | 2.45    | 17.88   | 17.96     | 9.75   | 17.32   | 15.10   | 13.17   | 6.28    | 5.67    | 11.44   | 8.44    | 9.34    | 6.08     | 1.90     | 13.58   | 17.54   | 16.69   | 17.27   | 3.70   | 8.45    | 0.61    | 16.68   |
| Pr ppm | 1.68    | 1.65      | 2.41    | 2.43      | 0.28    | 2.79    | 1.72    | 1.15    | 0.85    | 0.73    | 0.20    | 2.23    | 0.41    | 2.72    | 2.74      | 1.49   | 2.64    | 2.32    | 2.02    | 0.96    | 0.93    | 1.61    | 1.36    | 1.51    | 1.04     | 0.33     | 2.07    | 2.59    | 2.53    | 2.67    | 0.57   | 1.34    | 0.10    | 2.51    |
| Nd ppm | 7.90    | 7.84      | 11.17   | 11.24     | 1.58    | 15.08   | 9.66    | 6.20    | 4.26    | 3.69    | 1.29    | 11.97   | 2.36    | 14.38   | 14.39     | 7.45   | 14.12   | 12.62   | 11.08   | 4.76    | 4.91    | 8.09    | 7.42    | 7.81    | 6.00     | 1.90     | 11.14   | 13.34   | 13.32   | 14.20   | 3.09   | 7.22    | 0.58    | 13.40   |
| Sm ppm | 2.37    | 2.33      | 3.39    | 3.47      | 0.68    | 5.42    | 3.71    | 2.30    | 1.41    | 1.26    | 0.54    | 4.34    | 1.00    | 5.05    | 5.08      | 2.20   | 5.24    | 4.58    | 4.07    | 1.48    | 1.92    | 2.67    | 2.88    | 2.77    | 2.44     | 0.73     | 3.97    | 4.48    | 4.76    | 5.01    | 1.14   | 2.63    | 0.26    | 4.82    |
| Eu ppm | 0.91    | 0.91      | 0.94    | 0.94      | 0.26    | 1.99    | 1.41    | 0.98    | 0.39    | 0.52    | 0.23    | 1.49    | 0.37    | 1.47    | 1.45      | 0.62   | 1.85    | 1.52    | 1.66    | 0.32    | 0.74    | 0.74    | 0.97    | 1.33    | 0.96     | 0.24     | 1.49    | 1.24    | 1.69    | 1.64    | 0.35   | 1.00    | 0.11    | 1.67    |
| Gd ppm | 2.69    | 2.64      | 3.94    | 3.82      | 0.94    | 7.10    | 5.16    | 3.09    | 1.67    | 1.50    | 0.84    | 5.46    | 1.32    | 6.06    | 6.26      | 2.38   | 6.53    | 5.74    | 5.46    | 1.79    | 2.48    | 2.94    | 3.90    | 3.39    | 3.33     | 0.83     | 5.32    | 5.28    | 6.31    | 6.43    | 1.58   | 3.26    | 0.32    | 6.15    |
| Tb ppm | 0.46    | 0.45      | 0.69    | 0.69      | 0.18    | 1.34    | 0.96    | 0.56    | 0.29    | 0.28    | 0.16    | 1.03    | 0.24    | 1.13    | 1.15      | 0.41   | 1.23    | 1.09    | 1.02    | 0.32    | 0.46    | 0.53    | 0.74    | 0.63    | 0.63     | 0.15     | 1.01    | 0.97    | 1.15    | 1.19    | 0.29   | 0.59    | 0.06    | 1.13    |
| Dy ppm | 2.98    | 2.99      | 4.45    | 4.40      | 1.21    | 8.85    | 6.47    | 3.92    | 1.89    | 1.85    | 1.06    | 6.67    | 1.65    | 7.45    | 7.41      | 2.55   | 8.11    | 7.13    | 6.71    | 2.19    | 3.06    | 3.22    | 4.80    | 4.08    | 4.06     | 0.92     | 6.52    | 6.29    | 7.66    | 7.83    | 2.01   | 3.81    | 0.45    | 7.43    |
| Ho ppm | 0.68    | 0.66      | 0.95    | 0.95      | 0.26    | 1.92    | 1.41    | 0.83    | 0.40    | 0.40    | 0.22    | 1.40    | 0.34    | 1.61    | 1.62      | 0.52   | 1.71    | 1.49    | 1.48    | 0.50    | 0.64    | 0.65    | 1.05    | 0.86    | 0.88     | 0.19     | 1.42    | 1.39    | 1.68    | 1.69    | 0.44   | 0.79    | 0.10    | 1.56    |
| Er ppm | 1.96    | 1.93      | 2.69    | 2.61      | 0.71    | 5.28    | 3.91    | 2.28    | 1.08    | 1.10    | 0.63    | 3.88    | 0.92    | 4.48    | 4.47      | 1.46   | 4.79    | 4.11    | 4.12    | 1.47    | 1.80    | 1.71    | 2.95    | 2.38    | 2.43     | 0.50     | 3.97    | 3.82    | 4.62    | 4.71    | 1.23   | 2.23    | 0.27    | 4.28    |
| Tm ppm | 0.31    | 0.30      | 0.40    | 0.41      | 0.10    | 0.75    | 0.56    | 0.34    | 0.16    | 0.16    | 0.09    | 0.55    | 0.13    | 0.64    | 0.67      | 0.22   | 0.67    | 0.59    | 0.59    | 0.23    | 0.26    | 0.24    | 0.43    | 0.34    | 0.35     | 0.07     | 0.58    | 0.57    | 0.69    | 0.69    | 0.18   | 0.32    | 0.04    | 0.61    |
| Yb ppm | 2.04    | 2.03      | 2.61    | 2.65      | 0.65    | 4.77    | 3.55    | 2.10    | 1.00    | 1.07    | 0.56    | 3.44    | 0.77    | 4.14    | 4.14      | 1.38   | 4.22    | 3.59    | 3.64    | 1.51    | 1.59    | 1.43    | 2.73    | 2.17    | 2.16     | 0.45     | 3.61    | 3.59    | 4.25    | 4.30    | 1.18   | 2.00    | 0.26    | 3.76    |
| Lu ppm | 0.34    | 0.33      | 0.42    | 0.43      | 0.10    | 0.74    | 0.55    | 0.33    | 0.16    | 0.17    | 0.09    | 0.54    | 0.12    | 0.65    | 0.65      | 0.21   | 0.65    | 0.57    | 0.57    | 0.27    | 0.25    | 0.23    | 0.43    | 0.35    | 0.34     | 0.07     | 0.58    | 0.58    | 0.68    | 0.67    | 0.18   | 0.30    | 0.04    | 0.57    |
| Ba ppm | 92.63   | 93.07     | 365.27  | 368.35    | 15.38   | 30.27   | 80.84   | 6.34    | 24.32   | 128.15  | 14.02   | 66.12   | 91.66   | 75.35   | 75.01     | 59.75  | 17.21   | 87.30   | 89.00   | 29.62   | 39.95   | 285.27  | 28.31   | 28.32   | 1281.40  | 10.25    | 82.97   | 260.55  | 145.42  | 14.75   | 28.08  | 100.14  | 6.93    | 115.01  |
| Th ppm | 1.80    | 1.84      | 1.89    | 1.91      | 0.07    | 0.57    | 0.35    | 0.33    | 0.42    | 0.38    | 0.06    | 0.49    | 0.14    | 0.90    | 0.90      | 0.95   | 0.54    | 0.51    | 0.41    | 0.53    | 0.27    | 1.08    | 0.43    | 0.50    | 0.04     | 0.06     | 0.40    | 1.11    | 0.55    | 0.52    | 0.27   | 0.28    | 0.02    | 0.53    |
| Nb ppm | 1.97    | 1.97      | 2.35    | 2.38      | 0.11    | 4.31    | 1.35    | 0.61    | 0.44    | 0.47    | 0.07    | 3.17    | 0.16    | 2.17    | 2.20      | 0.60   | 3.84    | 3.26    | 2.82    | 0.78    | 0.63    | 1.02    | 0.93    | 0.84    | 0.64     | 0.08     | 2.91    | 2.34    | 4.04    | 3.78    | 0.55   | 1.02    | 0.03    | 3.94    |
| Y ppm  | 20.16   | 19.32     | 26.50   | 26.53     | 7.40    | 51.57   | 37.54   | 21.87   | 10.76   | 11.00   | 12.91   | 36.73   | 8.97    | 43.56   | 43.63     | 13.44  | 45.81   | 40.83   | 40.21   | 14.39   | 17.62   | 16.58   | 28.85   | 23.79   | 23.96    | 5.23     | 43.03   | 37.06   | 45.71   | 45.04   | 11.73  | 21.85   | 3.06    | 42.01   |
| Hf ppm | 3.07    | 3.07      | 3.66    | 3.76      | 0.27    | 3.88    | 2.67    | 1.43    | 0.76    | 0.86    | 0.20    | 3.15    | 0.42    | 2.97    | 2.95      | 0.82   | 3.56    | 3.19    | 2.75    | 1.40    | 1.34    | 1.45    | 2.04    | 1.67    | 1.09     | 0.23     | 2.75    | 3.29    | 3.55    | 3.47    | 0.85   | 1.58    | 0.11    | 3.40    |
| Ta ppm | 0.15    | 0.15      | 0.17    | 0.17      | 0.01    | 0.31    | 0.10    | 0.05    | 0.03    | 0.04    | 0.01    | 0.24    | 0.01    | 0.15    | 0.15      | 0.04   | 0.27    | 0.23    | 0.20    | 0.06    | 0.05    | 0.08    | 0.07    | 0.06    | 0.04     | 0.01     | 0.21    | 0.17    | 0.28    | 0.28    | 0.03   | 0.07    | 0.00    | 0.27    |
| U ppm  | 0.53    | 0.57      | 0.58    | 0.59      | 0.02    | 0.23    | 0.12    | 0.12    | 0.10    | 0.13    | 0.02    | 0.52    | 0.04    | 0.32    | 0.32      | 0.82   | 0.37    | 0.51    | 0.13    | 0.21    | 0.11    | 0.33    | 0.14    | 0.18    | 0.01     | 0.02     | 0.22    | 0.36    | 0.18    | 1.62    | 0.19   | 0.09    | 0.01    | 0.25    |
| Pb ppm | 1.78    | 1.78      | 2.15    | 2.18      | 1.61    | 1.83    | 1.56    | 1.61    | 2.26    | 1.72    | 1.57    | 2.16    | 1.64    | 1.57    | 1.60      | 3.51   | 3.81    | 2.24    | 1.68    | 1.92    | 3.43    | 1.92    | 1.48    | 2.31    | 1.91     | 1.59     | 2.05    | 1.75    | 2.15    | 2.92    | 1.78   | 2.93    | 1.54    | 2.22    |
| Rb ppm | 5.20    | 5.21      | 10.73   | 10.85     | 0.58    | 0.39    | 4.42    | 0.03    | 0.22    | 4.04    | 0.63    | 3.02    | 0.85    | 2.66    | 2.60      | 1.20   | 0.25    | 3.88    | 0.13    | 0.33    | 0.37    | 11.01   | 1.35    | 0.39    | 0.52     | 0.42     | 7.49    | 9.31    | 13.98   | 0.26    | 0.24   | 0.20    | 0.22    | 1.84    |
| Cs ppm | 0.33    | 0.34      | 0.24    | 0.25      | 0.14    | 0.25    | 0.10    | 0.00    | 0.04    | 0.62    | 0.14    | 0.12    | 0.28    | 0.13    | 0.14      | 0.02   | 0.11    | 0.14    | 0.03    | 0.01    | 0.03    | 0.12    | 0.04    | 0.03    | 0.26     | 0.09     | 1.12    | 0.19    | 1.29    | 0.13    | 0.01   | 0.15    | 0.14    | 0.25    |
| Sr ppm | 409.10  | 406.86    | 211.90  | 213.05    | 54.05   | 58.89   | 468.33  | 374.38  | 38.00   | 333.97  | 47.91   | 130.32  | 37.09   | 408.87  | 407.71    | 199.33 | 62.24   | 162.87  | 112.14  | 39.39   | 66.49   | 51.35   | 268.51  | 343.06  | 232.73   | 21.24    | 268.53  | 350.47  | 332.42  | 62.83   | 154.58 | 78.08   | 11.88   | 177.16  |
| Sc ppm | 11.06   | 10.64     | 10.38   | 10.36     | 43.50   | 41.49   | 44.24   | 34.80   | 47.46   | 33.11   | 39.91   | 35.31   | 61.18   | 23.80   | 24.51     | 54.15  | 36.42   | 34.84   | 40.98   | 35.76   | 28.53   | 31.29   | 41.76   | 36.31   | 42.18    | 42.56    | 35.48   | 16.04   | 37.65   | 35.56   | 51.55  | 38.64   | 21.94   | 40.42   |
| Zr ppm | 99.06   | 97.46     | 119.73  | 121.51    | 6.87    | 134.24  | 87.02   | 42.81   | 21.30   | 25.31   | 5.34    | 104.37  | 12.07   | 90.88   | 91.24     | 24.79  | 121.39  | 108.51  | 92.27   | 40.99   | 43.11   | 47.14   | 64.33   | 54.04   | 25.29    | 5.80     | 91.53   | 104.27  | 120.41  | 116.37  | 24.73  | 52.38   | 2.72    | 116.92  |

**Table 13. Sample location data for analyzed samples.**

| Sample  | Latitude<br><i>dd.mm.sss</i> | Longitude<br><i>dd.mm.sss</i> | Elevation<br><i>feet</i> | Sample  | Latitude<br><i>dd.mm.sss</i> | Longitude<br><i>dd.mm.sss</i> | Elevation<br><i>feet</i> |
|---------|------------------------------|-------------------------------|--------------------------|---------|------------------------------|-------------------------------|--------------------------|
| CR 03-2 | 35.20.848                    | 120.37.903                    | 1910                     | CR 44-1 | 35.24.565                    | 120.43.859                    | 2600                     |
| CR 04-1 | 35.20.673                    | 120.38.510                    | 2060                     | CR 46-1 | 35.20.696                    | 120.38.473                    | 1920                     |
| CR 06-1 | 35.20.954                    | 120.38.749                    | 2070                     | CR 49-1 | 35.20.112                    | 120.38.491                    | 1340                     |
| CR 07-1 | 35.21.044                    | 120.38.694                    | 2110                     | CR 52-1 | 35.20.196                    | 120.37.802                    | 1400                     |
| CR 07-2 | 35.21.044                    | 120.38.694                    | 2110                     | CR 54-3 | 35.20.434                    | 120.37.826                    | 1240                     |
| CR 07-3 | 35.21.044                    | 120.38.694                    | 2110                     | CR 63-1 | 35.25.241                    | 120.43.972                    | 1680                     |
| CR 08-1 | 35.21.058                    | 120.38.898                    | 2540                     | CR 64-2 | 35.24.869                    | 120.43.975                    | 2630                     |
| CR 09-2 | 35.21.342                    | 120.39.135                    | 2170                     | CR 66-1 | 35.24.899                    | 120.44.014                    | 2630                     |
| CR 10-1 | 35.21.356                    | 120.39.182                    | 2240                     | CR 68-1 | 35.24.907                    | 120.44.269                    | 2530                     |
| CR 10-2 | 35.21.356                    | 120.39.182                    | 2240                     | CR 70-1 | 35.23.989                    | 120.42.994                    | 2470                     |
| CR 10-3 | 35.21.356                    | 120.39.182                    | 2240                     | CR 73-3 | 35.23.632                    | 120.42.557                    | 2580                     |
| CR 11-2 | 35.21.392                    | 120.39.286                    | 2310                     | CR 75-1 | 35.23.127                    | 120.42.034                    | 2390                     |
| CR 12-1 | 35.21.579                    | 120.39.329                    | 2380                     | CR 76-1 | 35.23.100                    | 120.42.020                    | 2380                     |
| CR 20-1 | 35.22.802                    | 120.41.544                    | 2480                     | CR 78-2 | 35.20.627                    | 120.38.565                    | 1940                     |
| CR 21-1 | 35.22.856                    | 120.41.602                    | 2380                     | CR 79-1 | 35.20.646                    | 120.38.872                    | 1830                     |
| CR 22-1 | 35.22.891                    | 120.41.643                    | 2390                     | CR 80-1 | 35.20.663                    | 120.38.590                    | 1830                     |
| CR 25-1 | 35.23.024                    | 120.41.617                    | 2650                     | CR 81-2 | 35.20.667                    | 120.38.614                    | 1800                     |
| CR 26-1 | 35.23.024                    | 120.41.617                    | 2660                     | CR 82-1 | 35.20.657                    | 120.38.679                    | 1780                     |
| CR 27-2 | 35.23.024                    | 120.41.617                    | 2670                     | CR 82-2 | 35.20.657                    | 120.38.679                    | 1780                     |
| CR 29-1 | 35.23.080                    | 120.41.848                    | 2510                     | CR 82-3 | 35.20.657                    | 120.38.679                    | 1780                     |
| CR 29-2 | 35.23.080                    | 120.41.848                    | 2510                     | CR 84-4 | 35.20.739                    | 120.38.701                    | 1740                     |
| CR 30-1 | 35.23.084                    | 120.41.964                    | 2410                     | CR 84-6 | 35.20.739                    | 120.38.701                    | 1740                     |
| CR 30-2 | 35.23.084                    | 120.41.964                    | 2410                     | CR 85-1 | 35.20.752                    | 120.38.773                    | 1690                     |
| CR 31-1 | 35.23.424                    | 120.42.322                    | 2450                     | CR 85-3 | 35.20.752                    | 120.38.773                    | 1690                     |
| CR 32-1 | 35.23.638                    | 120.42.558                    | 2600                     | CR 87-1 | 35.20.844                    | 120.38.945                    | 1570                     |
| CR 33-1 | 35.23.721                    | 120.42.416                    | 2660                     | CR 87-2 | 35.20.844                    | 120.38.945                    | 1570                     |
| CR 33-2 | 35.23.721                    | 120.42.416                    | 2660                     | CR 88-2 | 35.21.482                    | 120.39.503                    | 2150                     |
| CR 36-1 | 35.24.569                    | 120.43.844                    | 2580                     | CR 89-2 | 35.210.43                    | 120.39.512                    | 2070                     |
| CR 37-1 | 35.24.676                    | 120.43.952                    | 2580                     | CR 90-1 | 35.21.383                    | 120.39.606                    | 1990                     |
| CR 38-2 | 35.24.743                    | 120.44.024                    | 2580                     | CR 90-2 | 35.21.383                    | 120.39.606                    | 1990                     |
| CR 40-1 | 35.24.876                    | 120.44.286                    | 2170                     | CR 90-4 | 35.21.383                    | 120.39.606                    | 1990                     |
| CR 41-3 | 35.24.474                    | 120.43.941                    | 2180                     | CR 91-1 | 35.21.784                    | 120.41.149                    | 1660                     |
| CR 42-1 | 35.24.526                    | 120.43.923                    | 2240                     | CR 92-1 | 35.21.757                    | 120.41.227                    | 1650                     |
| CR 43-1 | 35.24.541                    | 120.43.870                    | 2420                     |         |                              |                               |                          |
