# Supplementary material
Source: publisher figshare collection journal article supplement (https://gsapubs.figshare.com/articles/dataset/_/12532325)
Supplement: Supplementary file 1 [file 1]

## Sheet: Table1
Table 1. Whole-rock geochemistry of mantle tectonites by x-ray flourescence.
Major and trace elements normalized to 100% anhydrous.
Sample	CR 114-3	CR 12-1	CR 90-1	CR 91-1	CR 92-1
SiO2	47.316	47.7842	46.0829	46.4973	46.8948
TiO2	0.014375	0.0269876	0.0258354	0.00569485	0.00562503
Al2O3	0.205673	0.535434	0.504867	0.192486	0.208126
FeO*	7.15943	7.51788	8.71267	8.52246	8.51112
MnO	0.0641347	0.0777242	0.0947299	0.141232	0.142876
MgO	45.2338	44.0534	44.5726	44.6351	44.2319
CaO	0	0	0	0	0
Na2O	0	0	0	0	0
K2O	0	0	0	0	0
P2O5	0.00663463	0.00431801	0.00645886	0.00569485	0.00562503
LOI	12.1358	12.0683	12.1413	13.4838	13.6194
Nb	1.1	0.9	0.5	1	0.2
Zr	1	1	2	1	1
Y	2	1	2	1	2
Sr	0	1	1	4	6
Rb	0	0	0	0	0
Sc	3	1.2	8.5	2.8	2.9
V	11	18	27	8	7
Cr	2418	1952	1609	1700	1399
Ni	3214	2732	2618	2771	2700
Cu	13	4	43	1	1
Zn	34	34	32	43	37
Ba	0	20	10	0	0

## Sheet: Table2
Table 2. Whole-rock geochemistry of wehrlitic suite.
Major and trace elements normalized to 100% anhydrous.
Sample	CR 09-2	CR 10-1	CR 114-2	CR 88-2	CR 89-2	CR 90-4	CR 99-1
SiO2	45.7091	45.7031	45.5569	48.5545	50.1874	46.8404	42.7645
TiO2	0.203338	0.187316	0.170418	0.297445	0.131913	0.140383	0.0823572
Al2O3	4.41473	3.82167	1.51352	3.5088	2.70269	2.1241	2.5309
FeO*	10.4161	10.3204	9.78827	8.6594	8.91335	8.37859	10.7533
MnO	0.177134	0.177898	0.182134	0.163856	0.165659	0.151182	0.150988
MgO	30.4828	31.3478	33.9643	26.4141	32.148	36.2101	40.7531
CaO	8.27396	8.16449	8.68811	11.879	5.71215	6.03322	2.95008
Na2O	0.266226	0.227082	0.103316	0.419554	0.0296549	0.0896291	0.00633517
K2O	0.0366846	0.0345332	0.0181069	0.0741003	0	0.0183578	0.00211172
P2O5	0.0199145	0.0156969	0.0149116	0.0292226	0.00920325	0.0140383	0.00633517
LOI	3.67865	3.94484	4.54393	1.61588	4.19757	4.94258	8.26037
Mg#	83.9099	84.406	86.0789	84.4617	86.5359	88.5075	87.1025
Nb	1.1	0.8	0.9	1	1	0.9	1.1
Zr	10	9	8	15	4	7	4
Y	7	7	7	8	5	5	2
Sr	52	44	19	35	13	15	11
Rb	1	0	0	0	0	0	1
Sc	27	29.9	24.7	39.8	24.2	21.9	13.7
V	123	118	102	177	99	86	57
Cr	1817	1906	1894	1463	2612	1969	1771
Ni	940	983	1010	775	1356	1476	1423
Cu	7	18	9	8	5	2	4
Zn	65	63	50	49	54	44	53
Ba	21	3	9	78	0	9	4

## Sheet: Table3
Table 3. Whole-rock geochemistry of isotropic gabbros.
Major and trace elements normalized to 100% anhydrous.
Sample	CR 08-1	CR 20-1	CR 21-1	CR 22-1	CR 49-1
SiO2	53.3205	54.8656	47.7594	50.7446	52.8312
TiO2	1.28336	1.66911	1.57038	1.30572	0.932017
Al2O3	13.6261	13.9724	14.1955	14.2936	12.4685
FeO*	11.7001	11.6647	12.564	11.6032	10.1741
MnO	0.168664	0.16019	0.227353	0.212506	0.186624
MgO	8.46563	6.14547	5.75649	8.83775	9.96728
CaO	6.3595	5.26275	12.1013	8.09682	9.20643
Na2O	4.59393	5.93039	5.13303	4.10125	2.85568
K2O	0.286513	0.0280052	0.464082	0.505696	1.21803
P2O5	0.195693	0.301336	0.228525	0.298872	0.160121
LOI	1.87079	3.96969	4.70898	4.29021	1.33409
Mg#	56.3198	48.4225	44.948	57.5783	63.5803
Nb	1.6	5.8	3.5	4.8	0
Zr	103	131	107	136	106
Y	37	43	39	45	33
Sr	472	47	286	342	1176
Rb	5	0	9	17	20
Sc	27	16.2	23.3	25.1	34.2
V	374	298	404	285	323
Cr	33	28	25	71	61
Ni	21	2	22	24	54
Cu	4	8	78	47	83
Zn	32	60	67	69	69
Ba	68	39	69	131	5634
CIPW normalizations
Orthoclase(Or)	1.69318	0.1655	2.74255	2.98847	7.19808
Albite(Ab)	38.8723	50.181	14.1172	33.5531	24.1638
Anorthite(An)	15.7126	11.4219	14.322	19.098	17.6053
Diopside(Di)	12.0299	10.609	37.083	15.772	22.1281
Hypersthene(Hy)	12.1199	8.90121			14.0487
Olivine(Ol)	16.695	14.8637	12.3703	24.8115	12.7424
Ilmenite(Il)	2.43767	3.17038	2.98284	2.48014	1.77031
Apatite(Ap)	0.453579	0.698439	0.529677	0.692728	0.37113

## Sheet: Table4
Table 4. Whole-rock geochemistry of volcanic suite.
Major and trace elements normalized to 100% anhydrous.
Sample	CR 29-1	CR 29-2	CR 30-1	CR 38-2	CR 41-3	CR 66-1	CR 03-2	CR 04-1	CR 40-1	CR 42-1	CR 43-1	CR 46-1	CR 64-2	CR 68-1	CR 79-1	CR 07-2	CR 11-2	CR 30-2	CR 32-1	CR 33-1	CR 73-3
Suite	Arc	Arc	Arc	Arc	Arc	Arc	Boninite	Boninite	Boninite	Boninite	Boninite	Boninite	Boninite	Boninite	Boninite	MORB	MORB	MORB	MORB	MORB	MORB
SiO2	50.4267	51.4262	60.3334	55.098	53.0444	60.862	54.6667	52.9314	54.1405	47.5537	54.5722	50.6755	59.2397	48.3174	49.3246	57.7515	50.4924	52.4478	51.057	51.5076	51.6005
TiO2	0.660537	0.689246	0.508323	0.690854	0.766244	0.671318	0.437995	0.54643	0.571265	0.850481	0.664414	0.9237	0.595143	0.481046	0.902074	1.00894	1.1581	1.85687	2.41718	2.01544	2.22259
Al2O3	13.6396	15.6792	14.9071	14.1987	14.1451	18.0938	11.1399	10.6286	15.5751	14.3573	14.0386	13.6394	17.2788	9.86653	14.4947	15.5663	13.0873	13.1757	12.7021	13.2637	13.6889
FeO*	7.10284	7.88623	5.25768	8.55983	8.42147	7.10531	9.21046	10.2029	9.04924	9.21812	6.27627	11.1625	6.80229	8.66697	13.848	14.3709	10.2612	9.506	10.7617	11.1091	11.4437
MnO	0.110089	0.111561	0.17676	0.107363	0.174659	0.0737088	0.190013	0.250666	0.195639	0.194047	0.106567	0.220441	0.115541	0.234298	0.144198	0.0584726	0.171896	0.17992	0.333076	0.299095	0.24341
MgO	6.97119	9.14577	7.47223	9.69297	9.60735	7.78252	12.6611	14.1495	11.887	14.4615	12.3281	13.0189	12.2146	12.6317	10.9043	5.10661	8.59482	5.43912	5.53977	4.20918	6.34874
CaO	15.4366	9.48707	5.20619	6.93772	8.89406	0.168963	7.89572	8.51424	4.49522	9.61476	8.08498	8.26061	0.137341	17.9209	10.304	1.70946	13.0983	11.3684	11.8313	11.8683	9.01444
Na2O	5.49989	5.38805	5.89786	4.54774	4.79917	4.79901	3.71008	2.53078	3.92731	3.6004	3.8125	1.92482	2.66943	1.8042	0	3.76633	2.92775	5.72861	5.08298	5.42282	5.16714
K2O	0.034403	0.0938877	0.0329367	0.0350095	0.0202829	0.41277	0.0397202	0.133199	0.0458354	0.00997956	0.0315352	0.0279583	0.872005	0.0203737	0	0.183444	0.0859482	0.07612	0.010706	0.0874277	0.0129976
P2O5	0.118117	0.0927831	0.207501	0.131869	0.127332	0.0306175	0.0483083	0.112223	0.112911	0.139714	0.0848188	0.146243	0.0752104	0.0565936	0.0782468	0.4781	0.122311	0.22144	0.264082	0.217419	0.257589
LOI	5.98487	4.8134	4.69327	4.79772	5.61497	4.61029	1.81451	2.43558	5.82289	8.15759	6.98548	3.34026	4.0522	11.8639	2.80279	2.63612	2.14134	4.76353	7.89462	8.04543	5.52048
Mg#	63.6227	67.3906	71.692	66.8643	67.0285	66.1228	71.0111	71.1922	70.0672	73.6538	77.7791	67.5151	76.1897	72.2004	58.3885	38.7714	59.8813	50.4857	47.8437	40.3053	49.7138
Nb	1.8	1.1	3.5	1.8	1.8	1.7	1	1	1.4	2	1.9	0.6	2.3	0.8	1.7	2.7	1.5	4.6	4.9	4.6	5.5
Zr	51	69	83	45	61	47	32	33	46	61	51	68	54	29	61	106	70	117	131	130	133
Y	18	20	15	16	22	14	12	13	16	23	18	25	17	13	23	37	26	37	47	42	46
Sr	218	557	238	150	214	58	153	184	37	77	69	330	50	40	373	168	320	134	57	180	56
Rb	1	1	0	0	0	5	1	1	1	0	1	0	13	2	0	2	1	4	0	4	1
Sc	27.3	27.5	17.2	26.5	25.2	23.4	39.7	40.3	29.4	23.6	21.4	24.2	22.4	44	23.1	15	33.5	27.2	31.8	31.5	31.1
V	244	231	132	247	215	259	218	241	259	231	182	352	259	261	263	64	337	342	434	329	453
Cr	195	206	154	131	72	17	307	348	135	131	438	171	108	512	49	8	67	63	59	109	34
Ni	147	168	123	34	22	4	71	167	33	43	171	83	31	72	30	0	48	25	15	25	10
Cu	12	12	0	307	1	90	3	1220	52	6	7	658	34	26	148	2	33	45	46	21	31
Zn	31	59	44	50	66	25	63	49	97	67	44	48	65	70	16	7	33	83	131	60	108
Ba	82	203	60	90	25	83	31	57	26	126	44	15	281	32	3	39	663	68	12	112	34

## Sheet: Table5
Table 5. Whole-rock geochemistry of diorite intrusive series.
Major and trace elements normalized to 100% anhydrous.
Sample	CR 06-1	CR 07-1	CR 78-2	CR 80-1	CR 82-1	CR 84-4	CR 85-1	CR 87-1	CR 98-2
SiO2	70.2028	53.1376	52.6864	72.849	74.4573	69.0072	69.5855	68.523	61.07
TiO2	0.467246	0.373402	0.380997	0.577501	0.495719	0.611096	0.58878	0.844593	0.848386
Al2O3	15.5926	16.8866	16.7878	14.1564	14.243	15.0539	15.5091	14.5326	15.9898
FeO*	3.39832	6.41407	6.5317	1.82604	1.47063	3.73293	3.47209	3.19179	6.6722
MnO	0.0325229	0.147649	0.152399	0.0413344	0.02376	0.0547251	0.049065	0.0484779	0.0955629
MgO	1.50798	9.74269	10.0518	1.21169	1.01304	2.1605	2.18624	2.20413	4.66559
CaO	3.32059	10.5098	10.6603	2.186	2.16324	2.72029	2.87315	4.12278	6.33901
Na2O	4.8741	2.29177	2.25659	6.55682	5.61059	6.18849	5.02288	5.35411	3.848
K2O	0.422798	0.438667	0.436513	0.433421	0.40932	0.239422	0.487227	0.829511	0.250587
P2O5	0.181044	0.0577757	0.0555167	0.161795	0.1134	0.231441	0.225927	0.349041	0.220856
LOI	0.977865	1.40717	1.21463	0.766955	0.807541	1.24673	1.20467	0.99093	1.2414
Mg#	44.1574	73.0224	73.2788	54.1802	55.107	50.7719	52.8759	55.1686	55.4779
Nb	3	1.1	1.4	3.2	5.1	3.3	3.2	3.5	2.1
Zr	106	40	39	117	153	119	123	124	111
Y	30	13	13	22	27	29	28	38	44
Sr	422	342	339	420	352	317	421	365	415
Rb	4	4	5	5	3	2	6	10	2
Sc	13.5	37.7	33.4	12.5	6	7.9	15.8	14.8	24.5
V	13	174	185	57	40	44	59	50	221
Cr	0	32	34	26	28	18	30	5	51
Ni	0	45	44	0	2	0	1	1	11
Cu	0	3	1	0	0	0	339	0	1
Zn	4	25	28	5	2	4	4	5	21
Ba	118	127	132	74	101	94	167	220	81
CIPW normalizations
Quartz (Q)	28.863			26.2945	33.5532	20.989	27.2235	22.0753	13.738
Corundum(C)	1.51227				0.908159	0.221837	2.03516
Orthoclase(Or)	2.49858	2.59236	2.57963	2.56135	2.41892	1.41489	2.87933	4.9021	1.48088
Albite(Ab)	41.243	19.3922	19.0945	55.4817	47.475	52.365	42.502	45.3048	32.5605
Anorthite(An)	15.2918	34.4935	34.3883	7.91485	9.99166	11.9848	12.7791	13.17	25.6165
Diopside(Di)		13.9772	14.6734	1.54186				4.11965	3.62903
Hypersthene(Hy)	9.28507	28.1145	25.3739	4.73639	4.44919	11.3285	10.94	8.02059	20.8568
Ilmenite(Il)	0.887506	0.709256	0.723681	1.09693	0.941591	1.16074	1.11835	1.60426	1.61146
Apatite(Ap)	0.419625	0.133913	0.128677	0.375009	0.262839	0.536436	0.523655	0.809009	0.511902

## Sheet: Table6
Table 6. Whole-rock geochemistry of late stage intrusives analyzed by x-ray fluorescence.
Major and trace elements normalized to 100% anhydrous.
Sample	CR 07-3	CR 100-1	CR 100-2	CR 10-2	CR 10-3	CR 75-1	CR 76-1	CR 81-2	CR 82-2	CR 82-2	CR 82-3	CR 84-6	CR 85-3	CR 87-2	CR 90-2	CR 98-1	CR 98-3	CR 99-3
SiO2	50.0127	45.1422	47.1697	52.1804	51.6327	55.4859	51.6327	49.4469	55.0117	53.9798	54.3124	53.6087	58.6744	53.9316	48.8993	52.6542	51.5262	57.1865
TiO2	1.38732	1.17434	1.67098	0.732391	0.535379	1.59008	0.535379	1.28983	1.76499	0.529573	0.449084	0.786813	0.534073	0.433668	1.49103	1.15926	0.977827	1.19698
Al2O3	14.4124	12.9345	15.1417	13.9899	12.559	14.5466	12.559	14.9365	13.7696	16.9392	17.2658	15.157	16.4559	12.492	14.679	13.8416	13.7322	14.4266
FeO*	12.8814	11.2006	13.6092	8.60543	10.0753	10.9098	10.0753	4.17751	8.90029	13.3889	12.8496	12.8802	10.7179	9.20663	13.269	10.9318	9.58599	9.44506
MnO	0.241083	0.195537	0.207034	0.149981	0.215048	0.141316	0.215048	0.0649791	0.171369	0.193861	0.193631	0.17756	0.0704977	0.144916	0.207526	0.170572	0.173909	0.0806081
MgO	12.27	11.8328	7.02444	8.65952	11.9721	6.9267	11.9721	12.9308	5.03629	9.85147	9.86936	9.83904	6.73787	13.5172	8.84352	8.97505	10.0648	5.92304
CaO	5.16465	16.4251	11.8111	12.2427	10.3548	4.48539	10.3548	15.6177	9.1306	1.13834	1.23877	3.62777	2.08395	7.2934	8.48261	8.21169	10.9038	5.56417
Na2O	3.35544	0.881592	2.83964	3.14195	2.37785	5.37779	2.37785	1.28659	5.89751	3.60771	3.38388	3.66217	4.1882	2.13049	3.82682	3.67257	2.6502	5.97825
K2O	0.107391	0.0748627	0.240974	0.203625	0.206087	0.165796	0.206087	0.0487343	0.0971457	0.23287	0.313776	0.110975	0.35142	0.787307	0.00225571	0.2527	0.246097	0.019876
P2O5	0.167662	0.138552	0.285096	0.094149	0.0716826	0.370537	0.0716826	0.200352	0.220488	0.138304	0.123644	0.149816	0.185858	0.062725	0.298882	0.130561	0.138908	0.178884
LOI	3.69265	3.19807	1.061	2.51842	3.54798	4.81136	3.54798	2.56788	3.70714	4.05191	4.36638	3.06454	2.80895	2.43703	2.99769	2.01172	1.72827	2.54085
Mg #	62.9275	65.3088	47.9107	64.1987	67.9227	53.0825	67.9227	84.6529	50.208	56.7322	57.7825	57.6495	52.836	72.3477	54.2891	59.3995	65.1691	52.7744
Nb	1.7	0.8	0	1.9	0.7	5.3	4.6	1.5	2.5	2.5	2.3	2.9	1.9	1.8	3.3	1.8	2.4	2.4
Zr	80	40	80	61	70	134	121	42	87	87	84	83	75	47	98	90	81	85
Y	30	25	39	22	24	41	40	18	21	21	23	28	19	14	37	33	28	29
Sr	279	231	643	312	888	172	164	151	226	226	263	282	402	239	105	362	343	44
Rb	2	1	2	2	4	5	5	2	4	4	5	2	5	13	0	3	5	0
Sc	19.8	38.2	34.1	34.5	34.1	20.7	30.9	21.7	14	14	15	19.9	18	32.4	22.8	32.4	34.7	25.3
V	371	376	512	259	284	326	336	193	187	187	198	249	236	246	325	342	257	257
Cr	86	142	35	42	178	26	186	280	29	29	30	37	11	430	55	36	80	15
Ni	32	72	18	44	64	14	27	136	23	23	24	18	8	164	65	39	53	17
Cu	24	78	77	9	51	55	40	798	2856	2856	2009	5	2	4	60	5	70	4
Zn	20	75	85	38	38	82	73	76	25	25	26	20	11	22	91	31	59	12
Ba	5	1087	5510	926	768	43	73	33	68	68	86	33	108	429	83	103	257	19

## Sheet: Table7
Table 7. Whole-rock geochemistry for tuffaceous radiolarian cherts by XRF.
Major and trace elements normalized to 100% anhydrous.
Sample	CR 36-1	CR 31-1	CR 63-1	CR 26-1	CR 54-3	CR 27-2	CR 37-1	CR 33-2	CR 52-1	CR 44-1	CR 70-1	CR 25-1
SiO2	83.0545	82.9299	79.2961	81.2476	91.7321	84.2454	85.8849	87.6116	80.25	84.1865	94.1164	84.987
TiO2	0.21746	0.248516	0.291382	0.24812	0	0.253693	0.191979	0.149666	0.286305	0.227626	0.0696634	0.258454
Al2O3	7.72527	8.51547	10.5938	8.58367	4.40376	6.91743	7.74421	7.36486	9.45642	6.55827	2.78311	8.13805
FeO*	5.27547	5.27849	5.88149	6.95817	2.51428	5.9606	4.1045	2.84419	5.31148	6.32801	2.07723	3.9006
MnO	0.240293	0.172881	1.30453	0.241703	0.00678894	0.131146	0.170648	0.185198	0.370942	0.343089	0.0571012	0.0857895
MgO	1.80818	1.26527	0.452003	1.94539	0.173118	1.98762	0.760449	0.728949	1.24135	1.5296	0.431685	1.03816
CaO	0.0967697	0.186928	0.13488	0	0	0.0515985	0.0170648	0.0742946	1.00102	0.12426	0.0867938	0.0792738
Na2O	0.862229	0.334957	0.423173	0	0.677762	0	0.35836	0	0.793085	0	0	0
K2O	0.663253	0.871969	1.41367	0.623509	0.389232	0.298842	0.646328	0.948602	1.11596	0.598206	0.0856517	1.28901
P2O5	0.0565396	0.195572	0.209013	0.151867	0.102966	0.153721	0.121587	0.0925991	0.173455	0.104466	0.292358	0.223704

## Sheet: Table8
Table 8. Pyroxene compositions, Mg#, suite, and formula per 6 oxygen.
Sample	CR 29-2	CR 29-2	CR 29-2	CR 29-2	CR 29-2	CR 29-2	CR 29-2	CR 29-2	CR 29-1	CR 29-1	CR 29-1	CR 29-1	CR 29-1	CR 29-1	CR 29-1	CR 88-2	CR 88-2	CR 88-2	CR 88-2	CR 88-2	CR 88-2	CR 88-2	CR 88-2	CR 88-2	CR 88-2	CR 88-2	CR 88-2	CR 88-2	CR 10-1	CR 10-1	CR 10-1	CR 90-4	CR 90-4	CR 90-4	CR 90-4	CR 90-4	CR 99-1	CR 99-1	CR 99-1	CR 99-1	CR 99-1	CR 99-1	CR 99-1	CR 99-1	CR 99-1	CR 114-2	CR 114-2
Point	pyx1	pyx2	pyx3	pyx4	pyx5	pyx6	pyx7	pyx8	pyx1	pyx2	pyx3	pyx4	pyx5	pyx6	pyx7	pyx1	pyx2	pyx3	pyx4	pyx5	pyx6	pyx7	pyx8	pyx9	pyx10	pyx12	pyx13	pyx11	pyx1	pyx2	pyx3	pyx1	pyx2	pyx3	pyx4	pyx5	pyx1	pyx2	pyx3	pyx4	pyx5	pyx6	pyx7	pyx8	pyx9	pyx1	pyx2
Suite	volcanic	volcanic	volcanic	volcanic	volcanic	volcanic	volcanic	volcanic	volcanic	volcanic	volcanic	volcanic	volcanic	volcanic	volcanic	wehrlite	wehrlite	wehrlite	wehrlite	wehrlite	wehrlite	wehrlite	wehrlite	wehrlite	wehrlite	wehrlite	wehrlite	wehrlite	wehrlite	wehrlite	wehrlite	wehrlite	wehrlite	wehrlite	wehrlite	wehrlite	wehrlite	wehrlite	wehrlite	wehrlite	wehrlite	wehrlite	wehrlite	wehrlite	wehrlite	wehrlite	wehrlite
SiO2	52.2198	53.0667	53.6656	53.2892	51.7257	52.994	52.8871	53.0282	53.3897	53.3384	53.9522	53.4603	54.1169	53.5245	54.4484	56.1502	55.2299	54.1708	54.8947	54.7644	55.3922	57.0982	53.8548	56.5132	56.6776	56.2719	57.8989	50.7587	55.9345	52.847	56.953	56.8803	57.0215	57.723	57.0685	57.1583	53.826	53.8282	56.9466	56.8183	51.2616	53.5138	51.2958	53.5009	56.367	55.7317	56.2365
TiO2	0.385482	0.323739	0.385482	0.161869	0.405508	0.370464	0.448895	0.405508	0.208594	0.265332	0.218607	0.208594	0.208594	0.151857	0.203588	0.0150125	0.0683904	0.0417015	0.0633862	0.110092	0.1201	0.00500418	0.245205	0.198499	0.0717265	0.161802	0.116764	0.105088	0.203503	0.22352	0.176814	0.195244	0.277013	0.215269	0.158532	0.173551	0.135169	0.105132	0.203588	0.230288	0.318732	0.380476	0.208594	0.178557	0.121819	0.0100125	0.0367126
Al2O3	4.82402	3.57313	3.65439	3.63738	4.1948	3.86035	4.16834	4.14756	3.80366	3.56747	4.26849	3.01005	2.83432	4.34218	2.91368	0.70629	0.756414	1.17411	0.891596	0.81717	0.923493	0.94172	1.42929	1.23639	1.19538	1.46422	1.34727	0.716922	1.59333	2.30721	1.96242	2.44507	2.43752	2.3317	3.64872	2.47531	2.60191	2.12385	2.08228	2.18999	3.63171	3.61659	3.2538	3.33127	3.02328	1.1923	1.05626
FeO*	4.98898	4.77285	4.59403	4.49239	4.86161	5.05973	5.0057	5.84063	4.17077	4.07171	3.81185	3.95207	4.00868	4.04856	3.78997	11.0136	4.14376	4.50397	4.35217	4.0447	4.4062	11.1499	4.52713	10.701	10.9518	11.4381	10.6225	4.14118	10.8283	4.82302	11.1461	7.64685	7.62498	7.42815	7.33295	7.40885	3.27281	3.08112	8.95391	8.80339	3.34614	4.10902	5.04687	3.36415	8.64644	2.59741	2.16901
MnO	0.241459	0	0.0206596	0.21047	0.251789	0.0839297	0	0.00258245	0.0981332	0.135579	0.281487	0.142035	0.244042	0.333137	0.311186	0.258245	0.108463	0.125249	0.113628	0.127831	0.182063	0.308603	0.182063	0.307312	0.216926	0.264701	0.282779	0.122667	0.260828	0.184645	0.260828	0.229838	0.180772	0.207888	0.218217	0.109754	0.140744	0.0167859	0.056814	0.085221	0.0167859	0.0490666	0.0632701	0.149782	0.278905	0.142035	0.20014
MgO	17.1829	17.8347	18.2875	17.5676	17.2144	17.5909	17.2608	16.9158	17.3354	17.6506	17.7119	17.6124	18.2294	17.7882	17.9823	30.3859	16.7071	16.6275	16.7701	16.5844	16.7121	30.5981	16.8481	30.2913	30.2532	29.9132	31.0924	14.6573	30.2582	16.1001	30.5915	33.0239	33.1964	34.0207	32.999	33.1334	17.9956	16.9042	32.0586	32.4318	16.4813	16.9108	16.9308	17.4034	31.6274	17.3305	17.6108
CaO	19.5428	19.6134	19.5452	19.8154	19.4284	19.5781	19.9895	19.5732	20.1416	19.7667	20.1732	20.1562	19.6219	19.8824	19.7254	0.941529	24.1566	23.2878	23.7719	23.9593	23.8642	0.657531	22.987	1.1206	0.984898	1.23952	0.633748	24.7931	1.24651	22.7198	1.20594	1.01377	0.989432	0.978479	1.11478	1.13547	19.8544	21.4949	0.910326	1.02838	18.9039	20.789	19.4807	20.9667	1.12087	23.0369	23.1646
Cr2O3	0.284981	0.257214	0.340516	0.280597	0.55681	0.327363	0.264521	0.166604	0.533426	0.859328	0.626959	0.898787	0.593346	0.8111	0.602114	0.019	0.194385	0.121308	0.226538	0.150538	0.236769	0.119846	0.279154	0.156385	0.0423846	0.154923	0.0365385	0.138846	0.302538	0.647462	0.277692	0.336132	0.280597	0.246984	0.368283	0.410665	0.805255	0.816946	0.322979	0.267444	0.398974	0.670802	0.588961	0.827176	0.429664	0.0540734	0.0847637
Na2O	0.237244	0.206241	0.214328	0.191413	0.21298	0.217024	0.23994	0.204893	0.181977	0.186021	0.241288	0.268247	0.163105	0.235896	0.257464	0.031	0.254739	0.29113	0.206217	0.238565	0.234522	0.0404348	0.169826	0.0134783	0.0296522	0.00134783	0.0188696	0.153652	0.0283043	0.324826	0.0458261	0.00943584	0.0107838	0.0390913	0	0.0242636	0.183325	0.328906	0.0431353	0.0121318	0.296555	0.287119	0.23994	0.186021	0.00808786	0.0714428	0.0512231
K2O	0.0108414	0	0.0180691	0.00481841	0	0.0012046	0.0108414	0.0156598	0.00361381	0.00963683	0	0	0.0012046	0.00361381	0	0	0	0	0.0168645	0	0	0.00722762	0.00843223	0.00843223	0.00722762	0.0012046	0.00963683	0.00722762	0.0108414	0.00722762	0.00361381	0.0265013	0.0012046	0.00361381	0.00240921	0	0.0373427	0.00963683	0	0.0012046	0.0252967	0	0	0.00963683	0.0144552	0	0.0012046
SUM	99.9184	99.648	100.726	99.6512	98.852	100.083	100.276	100.301	99.8669	99.8508	101.286	99.7087	100.022	101.121	100.234	99.5207	101.62	100.344	101.307	100.797	102.072	100.927	100.531	100.547	100.431	100.911	102.059	95.5947	100.667	100.185	102.624	101.807	102.02	103.195	102.911	102.03	98.8525	98.7097	101.578	101.868	94.6809	100.327	97.1087	99.9177	101.638	100.166	100.611
Mg #	85.9895	86.9431	87.6446	87.4507	86.3198	86.1021	86.0037	83.7691	88.1047	88.5384	89.2243	88.8162	89.0153	88.6744	89.4236	83.0979	87.7822	86.805	87.2879	87.9615	87.1115	83.0227	86.897	83.4555	83.1154	82.3331	83.9124	86.3148	83.2763	85.6086	83.0245	88.5002	88.5821	89.0847	88.9125	88.8509	90.7393	90.7207	86.4503	86.781	89.7721	88.0008	85.6694	90.2139	86.6991	92.242	93.5352
Wo	39.6641	39.5627	39.0254	40.2857	39.7088	39.5023	40.3757	39.7041	41.0786	40.2921	40.7545	41.1476	39.7687	40.0574	40.3625	1.46814	47.5804	46.4117	46.8749	47.5929	47.0105	0.764162	45.616	1.47894	1.29026	1.57545	0.51163	51.0581	1.49179	45.8102	1.22533	0.54348	0.519516	0.579045	0.0840207	0.746226	40.8794	44.6529	0.573694	0.73003	41.2997	42.5557	40.3395	42.6842	0.41967	46.5204	46.6317
En	51.8825	52.5461	53.4409	52.2206	52.0432	52.0898	51.2791	50.5093	51.9125	52.8644	52.8614	52.2704	53.6151	53.1538	53.33	81.8779	46.0151	46.5173	46.3718	46.0981	46.16	82.3883	47.2581	82.2213	82.043	81.036	83.4831	42.2441	82.034	46.3911	82.0072	88.0192	88.1219	88.5689	88.8378	88.1879	53.6456	50.2113	85.9544	86.1475	52.6965	50.5514	51.1108	51.7068	86.3352	49.3306	49.9182
Fs	8.45338	7.89126	7.53369	7.49376	8.24797	8.40789	8.34522	9.78659	7.00886	6.84346	6.38413	6.58196	6.61621	6.78883	6.3075	16.6539	6.40453	7.07095	6.75332	6.30905	6.82957	16.8475	7.12595	16.2998	16.6667	17.3885	16.0053	6.6978	16.4743	7.79864	16.7674	11.4373	11.3586	10.8521	11.0782	11.0659	5.47499	5.13581	13.4719	13.1225	6.00383	6.89287	8.54972	5.60895	13.2451	4.14897	3.45013
Formula per 6 oxygen
Si	1.89834	1.92935	1.9275	1.93634	1.90288	1.92162	1.91502	1.92276	1.9342	1.93261	1.92462	1.9422	1.95399	1.91581	1.95991	1.9894	1.98767	1.97568	1.98246	1.98627	1.98512	1.99241	1.96089	1.9798	1.98699	1.97145	1.99007	1.96183	1.96155	1.93667	1.9589	1.94247	1.94196	1.94174	1.92413	1.94471	1.96252	1.97318	1.95698	1.94744	1.94872	1.93395	1.92395	1.93761	1.93709	2.00805	2.01328
Al	0.103352	0.0765615	0.0773546	0.0778938	0.0909472	0.0824971	0.0889528	0.0886303	0.0812115	0.0761794	0.089739	0.064448	0.060313	0.0915967	0.0618108	0.0147478	0.0160436	0.0252368	0.0189764	0.0174673	0.0195049	0.0193665	0.0306705	0.0255269	0.024698	0.0302324	0.0272913	0.0163304	0.0329305	0.0498304	0.0397796	0.0492104	0.048924	0.0462262	0.072502	0.0496337	0.0559095	0.0458832	0.0421725	0.0442374	0.0813658	0.0770285	0.0719244	0.0711029	0.0612315	0.0253182	0.0222857
Ti	0.010539	0.00885194	0.0104126	0.00442346	0.0112192	0.0101028	0.0122243	0.0110579	0.00568331	0.00723021	0.00586481	0.0056993	0.00566432	0.00408779	0.00551134	0.000400019	0.00185106	0.00114382	0.00172157	0.00300297	0.00323696	0.000131324	0.00671449	0.0052298	0.00189113	0.00426317	0.0030183	0.00305463	0.00536719	0.00616036	0.0045737	0.00501449	0.00709509	0.00544604	0.00401985	0.00444075	0.00370642	0.00289832	0.0052617	0.00593613	0.00911255	0.010341	0.00588398	0.00486336	0.00314844	0.000271314	0.000988452
Al	0	0.006	0.005	0.0142319	0	0.00411553	0.0039729	0.0113888	0.015409	0.00879443	0.0143545	0.00665064	0.0143039	0.00740421	0.021716	0.00415222	0.00370898	0.00092032	0.00143564	0.0037401	0.00462375	0.0117774	0	0.00532656	0.0116923	0.00168003	0.0173608	0	0	0	0	0	0	0	0	0	0.0184296	0.0190656	0	0	0.0300893	0.0109768	0	0.00871132	0	0.0333706	0.0355609
Fe	0.151679	0.145125	0.137997	0.13652	0.149576	0.153442	0.151588	0.177114	0.126367	0.123384	0.113722	0.120078	0.12105	0.121192	0.114094	0.326344	0.124721	0.13738	0.131448	0.122688	0.132062	0.32539	0.137856	0.313523	0.321105	0.335138	0.305351	0.13386	0.317582	0.147819	0.320622	0.218399	0.217178	0.208977	0.206772	0.210815	0.0997971	0.0944587	0.257339	0.252349	0.106384	0.124192	0.158311	0.101896	0.248507	0.0782686	0.0649414
Mn	0.00743523	0	0.00062854	0.00647803	0.00784611	0.00257791	0	7.9316e-05	0.00301141	0.0041611	0.00850559	0.00437089	0.00746388	0.0101003	0.00948812	0.00775025	0.00330645	0.00386934	0.00347592	0.00392726	0.00552676	0.00912153	0.00561515	0.00911931	0.00644181	0.00785527	0.00823295	0.00401595	0.00774792	0.00573171	0.00759907	0.00664854	0.00521487	0.00592356	0.00623215	0.00316306	0.00434672	0.000521212	0.0016538	0.00247419	0.000540524	0.00150202	0.00201012	0.0045949	0.00811881	0.0043349	0.00606918
Mg	0.930929	0.966352	0.978891	0.951343	0.943798	0.950625	0.931465	0.914097	0.935966	0.953117	0.941635	0.953595	0.980943	0.948886	0.964665	1.60445	0.89609	0.903775	0.902592	0.896439	0.892586	1.59123	0.91424	1.58151	1.58066	1.56185	1.5927	0.844279	1.58141	0.879315	1.56812	1.68075	1.6849	1.70557	1.65814	1.68005	0.977842	0.923494	1.64189	1.65664	0.933751	0.910807	0.946392	0.939337	1.61983	0.930603	0.939604
Ca	0.761238	0.764074	0.752202	0.771506	0.765839	0.760685	0.775566	0.760456	0.781864	0.767423	0.771088	0.784631	0.759146	0.762538	0.760797	0.0357437	0.931534	0.91007	0.91988	0.931127	0.916387	0.0245848	0.896821	0.0420646	0.0369974	0.0465308	0.0233404	1.02678	0.0468393	0.89214	0.0444442	0.037096	0.0361062	0.0352687	0.0402738	0.0413949	0.775661	0.844281	0.0335204	0.0377679	0.770023	0.805022	0.782912	0.813634	0.0412738	0.889385	0.888597
Cr	0.00409584	0.00369718	0.00483531	0.00403099	0.00809841	0.00469307	0.00378679	0.00238831	0.0076402	0.0123098	0.00884221	0.0129094	0.00847002	0.0114779	0.00856872	0.000266142	0.00276578	0.00174915	0.00323447	0.00215861	0.00335468	0.00165336	0.00401846	0.00216597	0.000587463	0.00214584	0.000496518	0.00212164	0.00419457	0.00938071	0.00377612	0.00453826	0.00377809	0.00328472	0.00490916	0.00552396	0.0116076	0.0118396	0.00438812	0.00362407	0.00599639	0.00958431	0.00873347	0.0118438	0.00583769	0.00077027	0.00119972
Na	0.00836152	0.00726964	0.00746328	0.00674316	0.0075962	0.00762956	0.0084232	0.00720268	0.00639161	0.00653458	0.0083449	0.00944821	0.00570963	0.00818598	0.00898496	0.00106484	0.00888823	0.0102941	0.00722021	0.00838877	0.00814839	0.00136792	0.00599493	0.000457779	0.00100784	4.57803e-05	0.000628797	0.00575759	0.00096233	0.0115408	0.00152812	0.000312409	0.000356062	0.00127489	0	0.000800352	0.00648028	0.0116891	0.00143715	0.000403136	0.0109299	0.0100599	0.00872502	0.00653156	0.000269469	0.00249564	0.00177788
K	0.000251407	0	0.000413986	0.000111686	0	2.78635e-05	0.000250416	0.000362207	8.35141e-05	0.000222736	0	0	2.7745e-05	8.25118e-05	0	0	0	0	0.000388506	0	0	0.00016088	0.000195849	0.000188437	0.000161634	2.69209e-05	0.000211292	0.000178196	0.000242526	0.000168959	7.92888e-05	0.000577312	2.61696e-05	7.75461e-05	5.18159e-05	0	0.000868518	0.000225342	0	2.63373e-05	0.000613441	0	0	0.000222633	0.000316885	0	2.75093e-05

## Sheet: Table9
Table 9. Olivine chemistry, suite, and Fo content.
Sample	CR 99-1	CR 99-1	CR 99-1	CR 99-1	CR 99-1	CR 10-1	CR 114-3
Point	oliv1	oliv2	oliv3	oliv4	oliv5	oliv1	oliv1
Suite	wehrlite	wehrlite	wehrlite	wehrlite	wehrlite	wehrlite	mantle
SiO2	40.7299	40.4433	40.5588	40.5396	40.5417	40.5801	38.9611
TiO2	0.0550689	0.00500627	0.0650815	0.0600752	0	0	0.111807
FeO*	13.6972	13.813	13.5325	14.0947	13.9133	16.8606	12.6217
MnO	0.0955508	0.238877	0.268575	0.318933	0.320224	0.242751	0.0916771
MgO	46.2013	45.6357	45.8829	45.6722	45.848	43.5887	43.5758
CaO	0.0340764	0.0547656	0.0693698	0.177684	0.0718038	0.0475661	0.0267743
Cr2O3	0.026306	0.0160759	0.0540734	0.0116915	0.0365361	0.0175385	0.013153
SUM	100.839	100.207	100.431	100.875	100.732	101.337	95.402
Fo	85.7362	85.4808	85.7994	85.2384	85.4485	82.1647	86.0184
Formula per 4 oxygen
Si	1.00567	1.00639	1.00584	1.00375	1.00436	1.01134	1.01388
Ti	0.00102259	9.36889e-05	0.00121383	0.00111866	0	0	0.00218816
Fe	0.282844	0.287462	0.280672	0.291863	0.288265	0.351426	0.274694
Mn	0.00199842	0.00503505	0.00564186	0.00668896	0.00671973	0.00512456	0.00202083
Mg	1.70011	1.69241	1.69581	1.68532	1.69274	1.61898	1.68999
Ca	0.000901547	0.00146023	0.00184336	0.00471401	0.00190602	0.00127021	0.000746568
Cr	0.000256792	0.000158154	0.000530171	0.000114448	0.000357846	0.000172808	0.000135322

## Sheet: Table10
Table 10. Hornblende chemistry
Sample	CR 88-2	CR 88-2	CR 88-2	CR 88-2	CR 88-2	CR 88-2	CR 10-1	CR 10-1	CR 10-1	CR 10-1	CR 87-1	CR 87-1	CR 88-2	CR 88-2	CR 88-2	CR 88-2	CR 10-3	CR 10-3	CR 10-3	CR 10-3	CR 10-3	CR 10-3	CR 10-3	CR 10-3
Point	hbl1	hbl2	hbl3	hbl4	hbl5	hbl6	hbl1	hbl2	hbl3	hbl4	hbl1	hbl2	hbl1	hbl2	hbl3	hbl4	hbl1	hbl2	hbl3	hbl4	hbl5	hbl6	hbl7	hbl8
Suite	diorite	diorite	late dike	late dike	late dike	late dike	late dike	late dike	late dike	late dike	late dike	wehrlite	wehrlite	wehrlite	wehrlite	wehrlite	wehrlite	wehrlite	wehrlite	wehrlite	wehrlite	wehrlite	wehrlite	wehrlite
SiO2	48.5217	48.5217	51.3694	52.7231	52.2448	53.0285	52.3046	51.9096	54.079	53.8142	51.7132	44.4384	44.2847	47.4149	43.6356	44.306	45.5893	44.558	45.2349	45.8776	45.5488	47.5046	47.5046	49.7936
TiO2	0.220276	0.220276	0.388658	0.433695	0.408674	0.370309	0.390326	0.460384	0.153461	0.203503	0.248541	3.1543	2.89408	1.37114	2.39366	2.39867	2.17515	2.20351	2.07506	0.578816	1.04254	0.390326	0.390326	1.17598
Al2O3	6.86473	6.86473	4.39874	2.97401	2.77807	2.80997	3.12438	3.04236	2.32392	2.46366	3.47829	8.97064	8.69876	7.92715	8.90077	8.97064	9.13013	8.94026	9.08152	8.86128	8.73977	8.09879	8.09879	5.31616
FeO*	18.1999	18.1999	16.0592	15.506	16.5815	13.9493	14.415	14.8344	12.3515	12.7709	14.6234	7.82695	8.00963	7.22745	7.81924	7.95432	7.88485	7.47189	7.41914	8.25921	8.62843	7.54907	7.54907	6.3951
MnO	0.34734	0.34734	0.462259	0.593964	0.48421	0.317642	0.423522	0.4416	0.361544	0.295691	0.285361	0.0994245	0.0774736	0.0296982	0.0490666	0.0710175	0.0606877	0.0516491	0.0903859	0.139452	0.0878034	0.0929683	0.0929683	0.0903859
MgO	12.0479	12.0479	12.4582	14.5909	13.5975	14.163	14.6656	14.2874	15.6507	15.4251	13.1846	16.0172	16.2178	17.5512	16.047	16.125	16.7668	15.8198	16.8049	17.1001	17.7138	17.6259	17.6259	16.5412
CaO	8.6907	8.6907	11.5544	10.7164	11.2606	12.5239	11.3599	11.4732	12.2944	12.2329	12.4413	11.8859	11.9027	12.0874	12.0342	11.823	11.837	11.9237	11.6761	11.6887	10.8982	12.1713	12.1713	16.4425
Cr2O3	0.00146144	0.00146144	0.0146154	0.0160769	0.0336154	0	0.0657692	0.0526154	0.0511538	0.0204615	0.0496923	0.312769	0.312769	0.381462	0.346385	0.308385	0.387308	1.29931	1.35777	0.362462	0.508615	0.312769	0.312769	0.736615
Na2O	0.369346	0.369346	0.326174	0.269565	0.324826	0.160391	0.316739	0.279	0.163087	0.19813	0.26687	2.43552	2.34117	1.91661	2.325	2.33443	2.2913	2.44765	2.51909	2.48539	2.37083	1.87213	1.87213	1.25078
K2O	0.326448	0.326448	0.0782992	0.103596	0.184304	0.0204783	0.0999821	0.104801	0.0554118	0.0566164	0.0361381	0.299946	0.311992	0.0626394	0.295128	0.290309	0.321629	0.434862	0.298742	0.401133	0.324038	0.454136	0.454136	0.140939
SUM	95.5898	95.5898	97.1098	97.9273	97.8981	97.3435	97.1658	96.8854	97.4842	97.4812	96.3274	95.4411	95.0511	95.9697	93.8461	94.5818	96.4441	95.1507	96.5576	95.7541	95.8628	96.072	96.072	97.8833
recalculated values
Si	6.58499	6.58811	6.86171	6.56107	6.60646	6.65958	6.61056	6.56694	6.73242	6.36471	7.75241	7.75241	6.54253	6.9536	7.22448	7.41352	7.58385	7.61217	7.7577	7.69002	7.61574	7.7236	7.76237	7.68205
Al	1.41501	1.41189	1.13829	1.43893	1.39354	1.34042	1.38944	1.43306	1.26758	1.63529	0.247588	0.247588	1.45747	1.0464	0.775523	0.586481	0.416146	0.387832	0.242301	0.309982	0.384256	0.276404	0.237631	0.317948
Ti	0.323644	0.35169	0.14923	0.270678	0.268987	0.238962	0.245857	0.226557	0.0638803	0.109559	0.0264681	0.0264681	0.0404289	0.0429691	0.128318	0.00907953	0.0431527	0.047092	0.0456375	0.0403867	0.042742	0.0515166	0.0165661	0.0218477
Al	0.109609	0.155682	0.213903	0.13855	0.183092	0.231623	0.173938	0.120944	0.265163	0	1.0452	1.0452	0	0.350925	0.133623	0	0.349304	0.118287	0.243922	0.170329	0.151959	0.257158	0.155547	0.0965885
Fe	0.99607	0.970443	0.874738	0.983272	0.991936	0.96328	0.927081	0.90078	1.01364	1.00835	2.43189	2.43189	0.869518	0.924151	0.775989	0.41953	1.98282	1.87233	2.05915	1.69179	1.75535	1.84594	1.48273	1.52467
Mn	0.00975812	0.0124855	0.00364048	0.00624929	0.00896978	0.00750923	0.00649061	0.0111148	0.0173344	0.0103926	0.0470074	0.0470074	0.0108456	0.0115271	0.0111082	0.0121568	0.0578072	0.0726405	0.0609024	0.0390182	0.0522348	0.0556559	0.0439579	0.0357544
Mg	3.59399	3.53891	3.78536	3.59592	3.58333	3.65019	3.4978	3.63587	3.73983	3.68888	2.86876	2.86876	3.61777	3.84509	3.5767	4.27954	2.74108	3.13958	3.00906	3.06095	3.18238	3.16816	3.34796	3.28163
Ca	1.89645	1.88812	1.87432	1.93886	1.88898	1.85276	1.89547	1.81627	1.83793	1.63174	1.48782	1.48782	1.79615	1.909	2.5562	1.79695	1.82779	1.65786	1.79161	1.94604	1.77232	1.82916	1.8909	1.87113
Cr	0.0367669	0.036657	0.0436415	0.0411741	0.0363521	0.0447272	0.15239	0.155829	0.0420498	0.0561853	0.000184592	0.000184592	0.0340538	0.0361934	0.08449	0.0100052	0.0017058	0.00183502	0.00394602	0	0.00757053	0.00618894	0.00580464	0.00230914
Na	0.675237	0.700349	0.537987	0.678075	0.675162	0.649214	0.704341	0.709339	0.707435	0.642573	0.11446	0.11446	0.500111	0.531534	0.351994	0.0628458	0.0934019	0.0754904	0.0935537	0.0451149	0.089453	0.0805187	0.0454052	0.0548595
K	0.0591896	0.0567342	0.0115655	0.0566166	0.0552289	0.0599431	0.082312	0.0553332	0.0751033	0.0577694	0.0665448	0.0665448	0.0797985	0.0848124	0.0260893	0	0.0147483	0.0190831	0.034916	0.00378888	0.0185735	0.0198946	0.0101477	0.0103115

[truncated: 3 more sheets: Table11, Table12, Table 13]
